# Supplementary material for: Two POM-based compounds containing Zn-capped Keggin anions as decent heterogeneous catalysts for sulfur oxidation and CO2 cycloaddition reactions
Source: Royal Society of Chemistry journal article supplement (doi:10.1039/d1dt04348j), 2022-01-01
Supplement: d1dt04348j1.pdf [file d1dt04348j1.pdf]

## Supporting Information

### **Two POM-based compounds containing Zn-capped Keggin anions as decent heterogeneous catalysts for sulfur oxidation and cycloaddition of CO<sub>2</sub> reactions**

Yin-Hua Zhu ‡, Jian-Bo Yang ‡, Xiao-Mei Liu, Ji-Lei Wang, Qing-Dong Ping, Ze-Yu Du, Jia-Nian Li, Ting-Ting Zang, Hua Mei\*, Yan Xu \*

College of Chemical Engineering, State Key Laboratory of Materials-Oriented Chemical Engineering, Nanjing Tech University, Nanjing 210009, P. R. China

Corresponding authors: Yan Xu and Hua Mei

E-mails: yanxu@njtech.edu.cn and meihua@njtech.edu.cn

## Content

|                                                                     |           |
|---------------------------------------------------------------------|-----------|
| <b>Section 1. Experiment</b> .....                                  | <b>3</b>  |
| <b>Synthesis</b> .....                                              | <b>3</b>  |
| <b>Crystal Structure</b> .....                                      | <b>4</b>  |
| <b>Section 2. Characterizations</b> .....                           | <b>8</b>  |
| <b>PXRD</b> .....                                                   | <b>8</b>  |
| <b>IR</b> .....                                                     | <b>9</b>  |
| <b>TGA</b> .....                                                    | <b>10</b> |
| <b>XPS</b> .....                                                    | <b>11</b> |
| <b>Section 3. Sulfur Oxidation</b> .....                            | <b>12</b> |
| <b>Catalytic Procedures</b> .....                                   | <b>12</b> |
| <b>Chemical Stability</b> .....                                     | <b>13</b> |
| <b>Recyclability Test</b> .....                                     | <b>14</b> |
| <b>Hot Filtration Test of catalyst 1</b> .....                      | <b>20</b> |
| <b>Section 4. Cycloaddition of CO<sub>2</sub> to Epoxides</b> ..... | <b>21</b> |
| <b>Catalytic Procedures</b> .....                                   | <b>21</b> |
| <b>Recyclability Test of catalyst 2</b> .....                       | <b>22</b> |
| <b>Section 5. Tables</b> .....                                      | <b>23</b> |

## Section 1. Experiment

### Synthesis

#### Synthesis of bbbm (bbb=1,1-(1,4-butanediyl) bis-1H-benzimidazole)<sup>1</sup>.

A mixture of 8 mL NaOH (25%) aqueous solution, benzimidazole (1.18 g, 10 mmol) and CH<sub>3</sub>CN (30 ml) was added into a round-bottomed flask and stirred with magnetic force for 4 h under N<sub>2</sub>. Then, one portion of dibromo alkane (4 mmol) was dripped slowly into the reaction system and refluxed for 24 h at room temperature. After completion of the reaction, adding water to the reaction solution to make the product precipitate. Finally, white solid was obtained after washing the above precipitate with CH<sub>3</sub>CN.

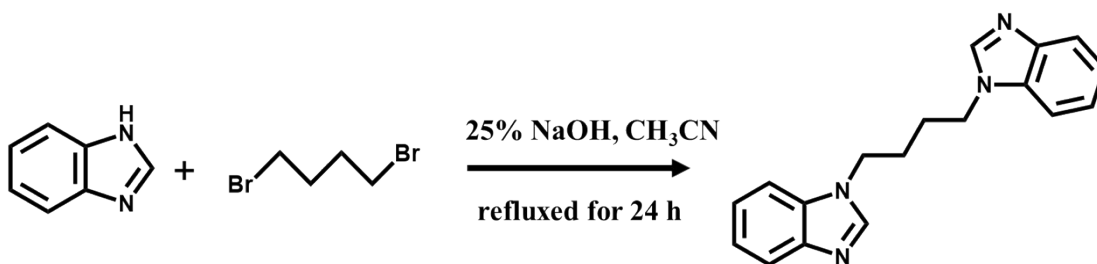

**Scheme S1.** Synthetic Strategy of the bbbm ligand.

## Crystal Structure

(a)

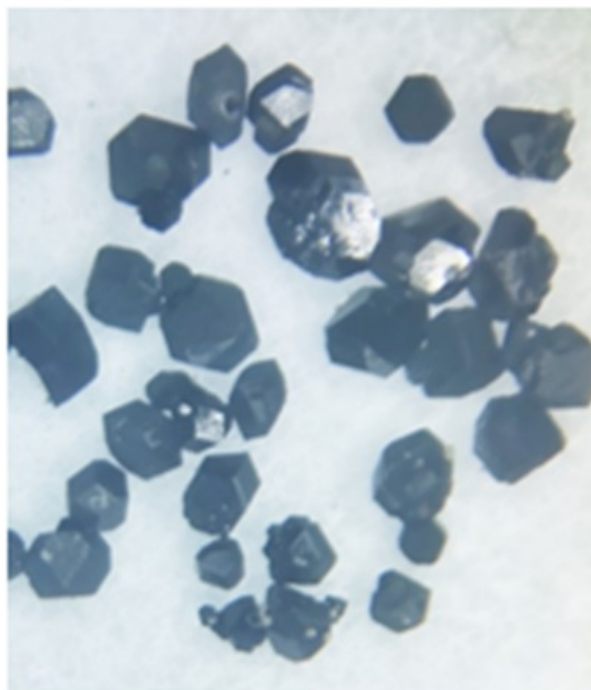

(b)

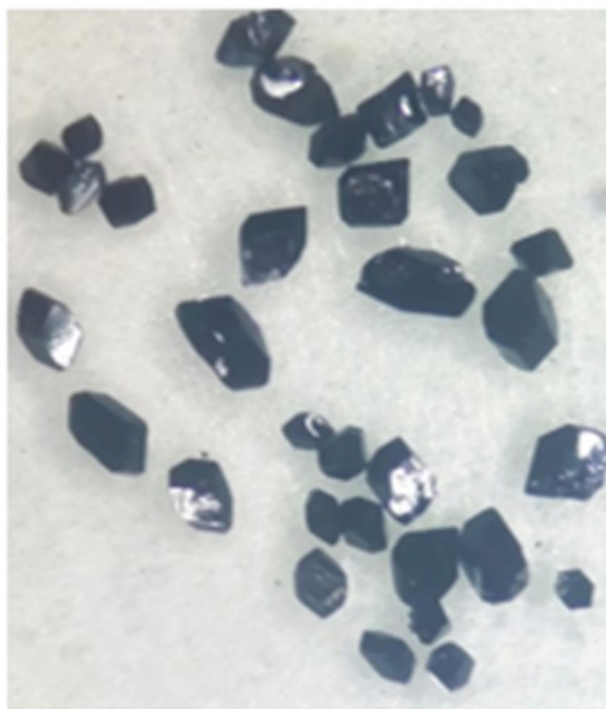

**Fig. S1** The crystal images of compounds **1** (a) and **2** (b) under optical microscope.

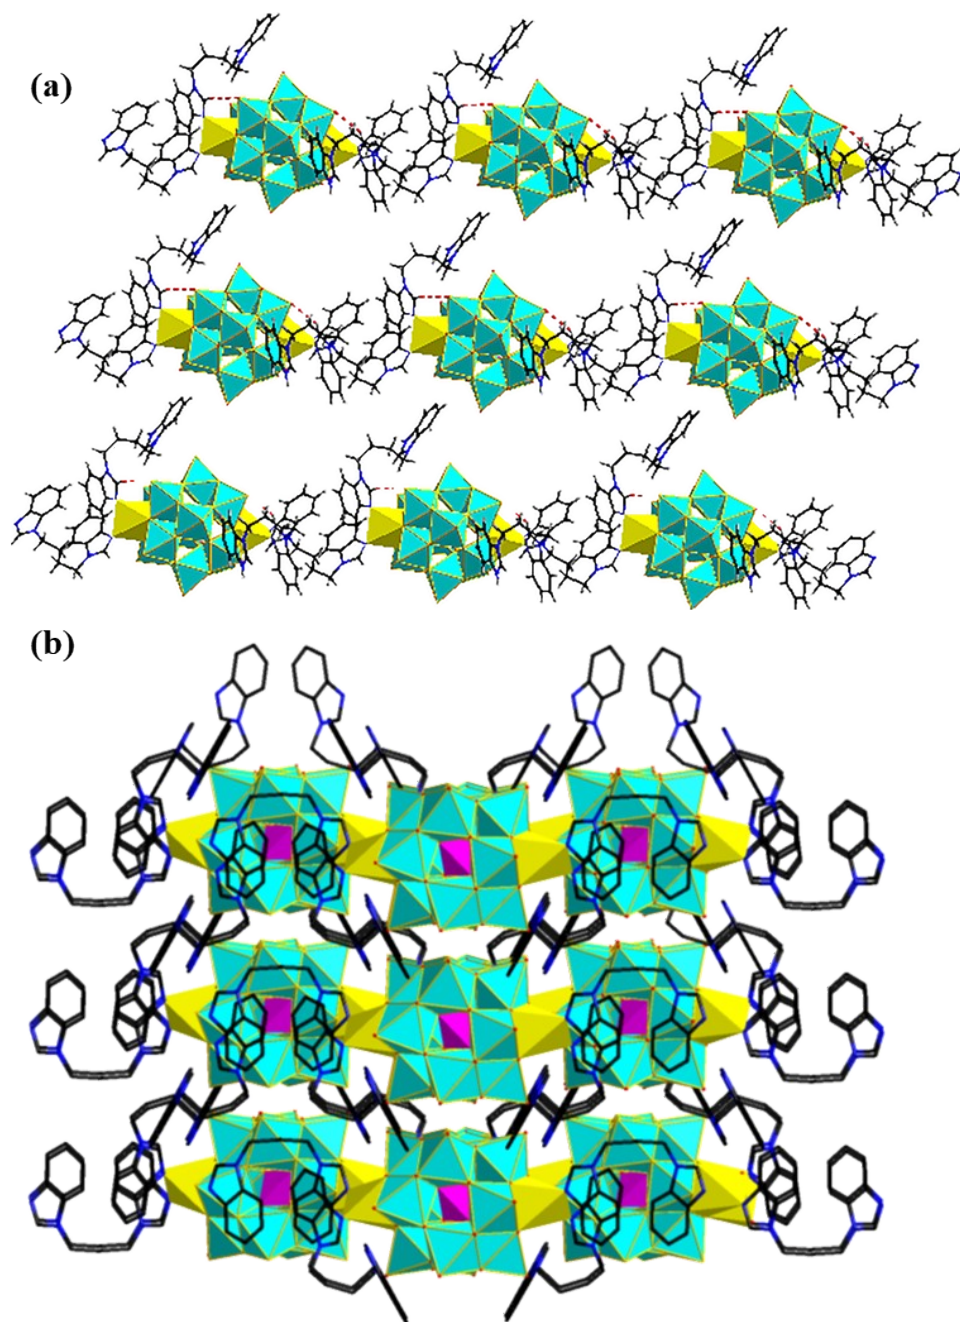

Fig. S2 2D (a) and 3D (b) supramolecular architecture of 1.

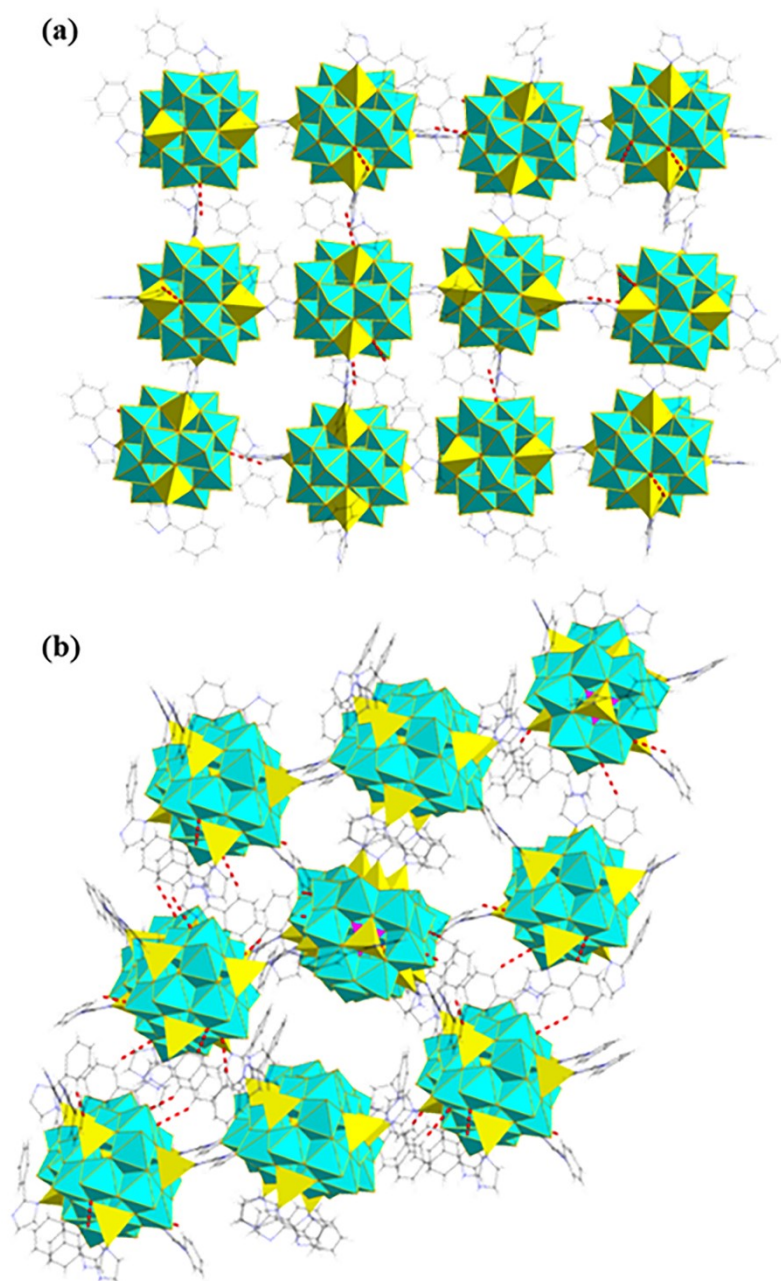

**Fig. S3** 2D (a) and 3D (b) supramolecular architecture of **2**.

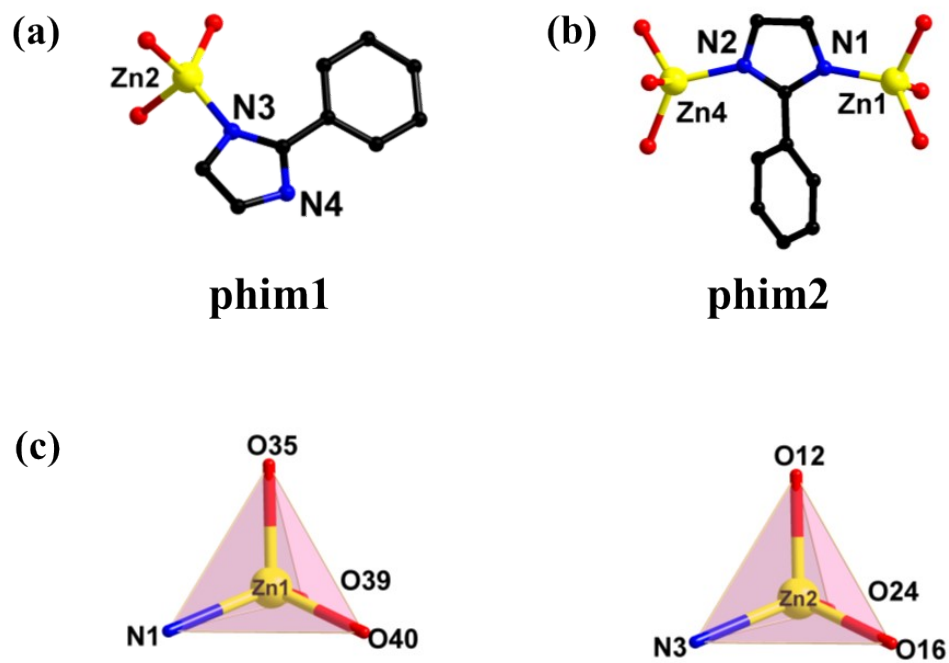

**Fig. S4** (a), (b) Ball-and-stick of the two different ligands connected to Zn in **2**. (c) Polyhedral view of coordination environment of Zn1 and Zn2. Hydrogen atoms and guest molecules have been omitted for clarity.

## Section 2. Characterizations

PXRD.

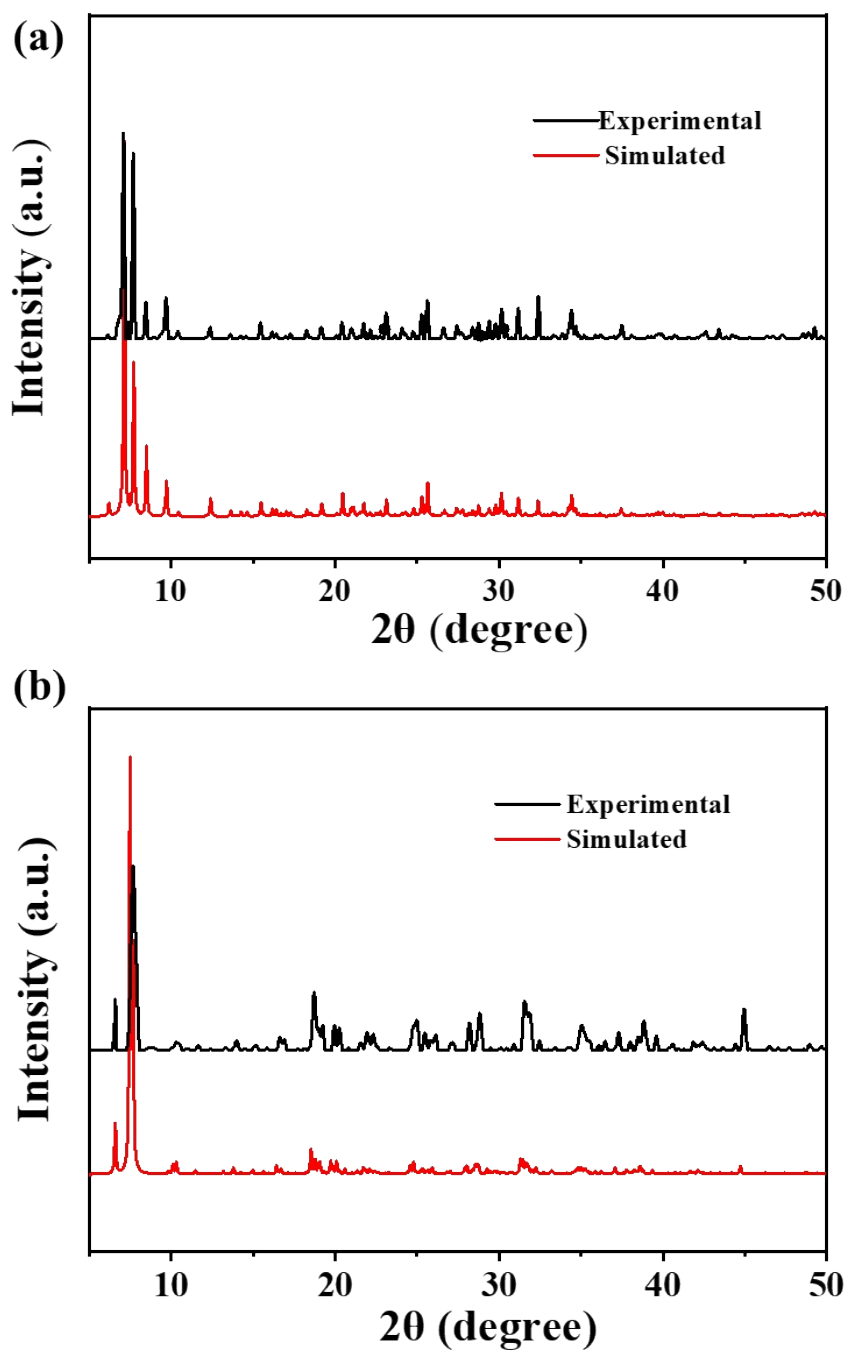

**Fig. S5** The simulated (red) and experimental (black) power X-ray diffraction patterns of compounds **1** (a) and **2** (b).



IR

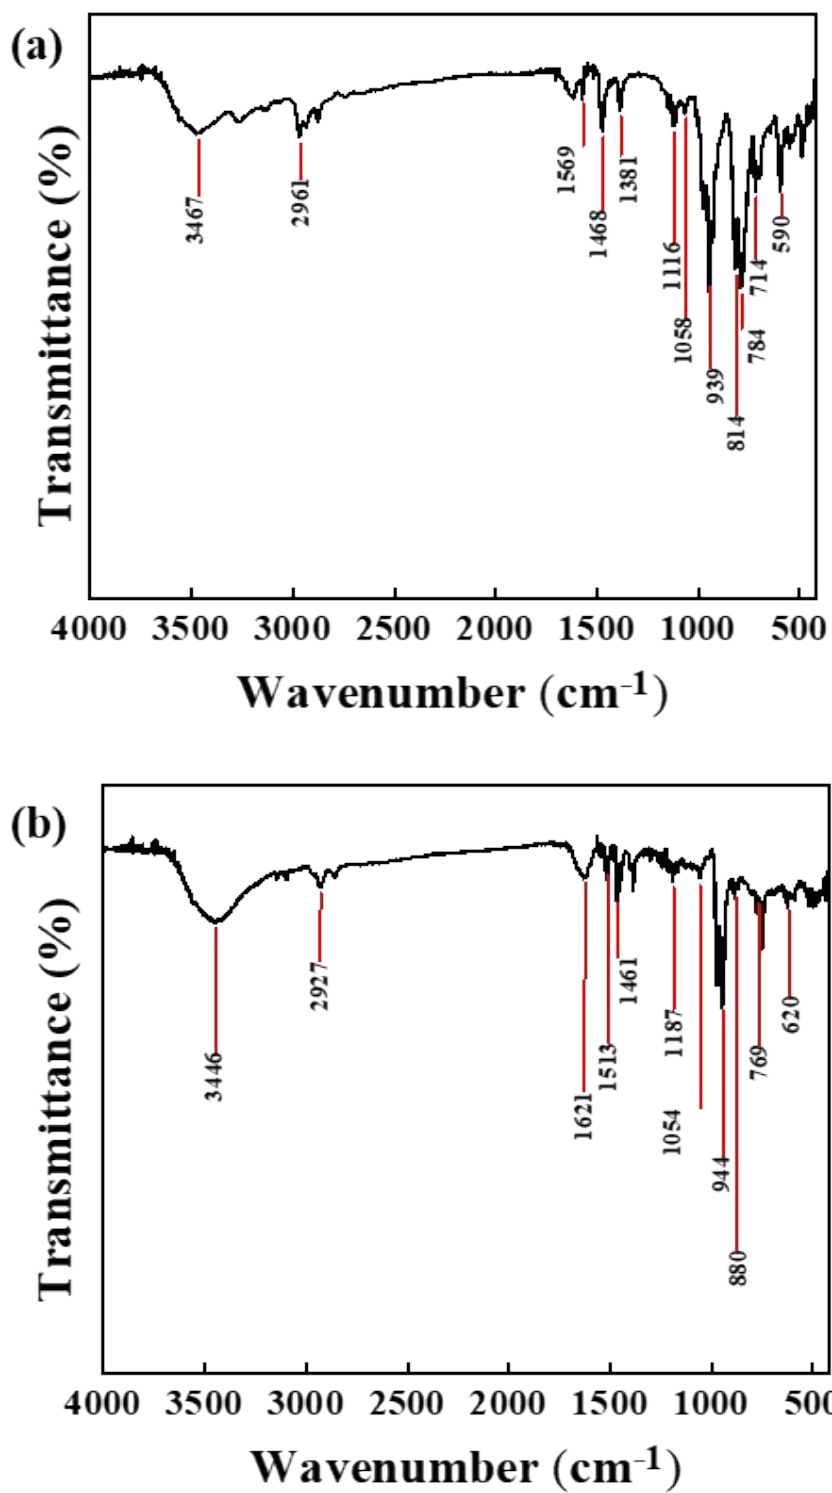

Fig. S6 FT-IR spectra of compounds 1 (a) and 2 (b).

TGA

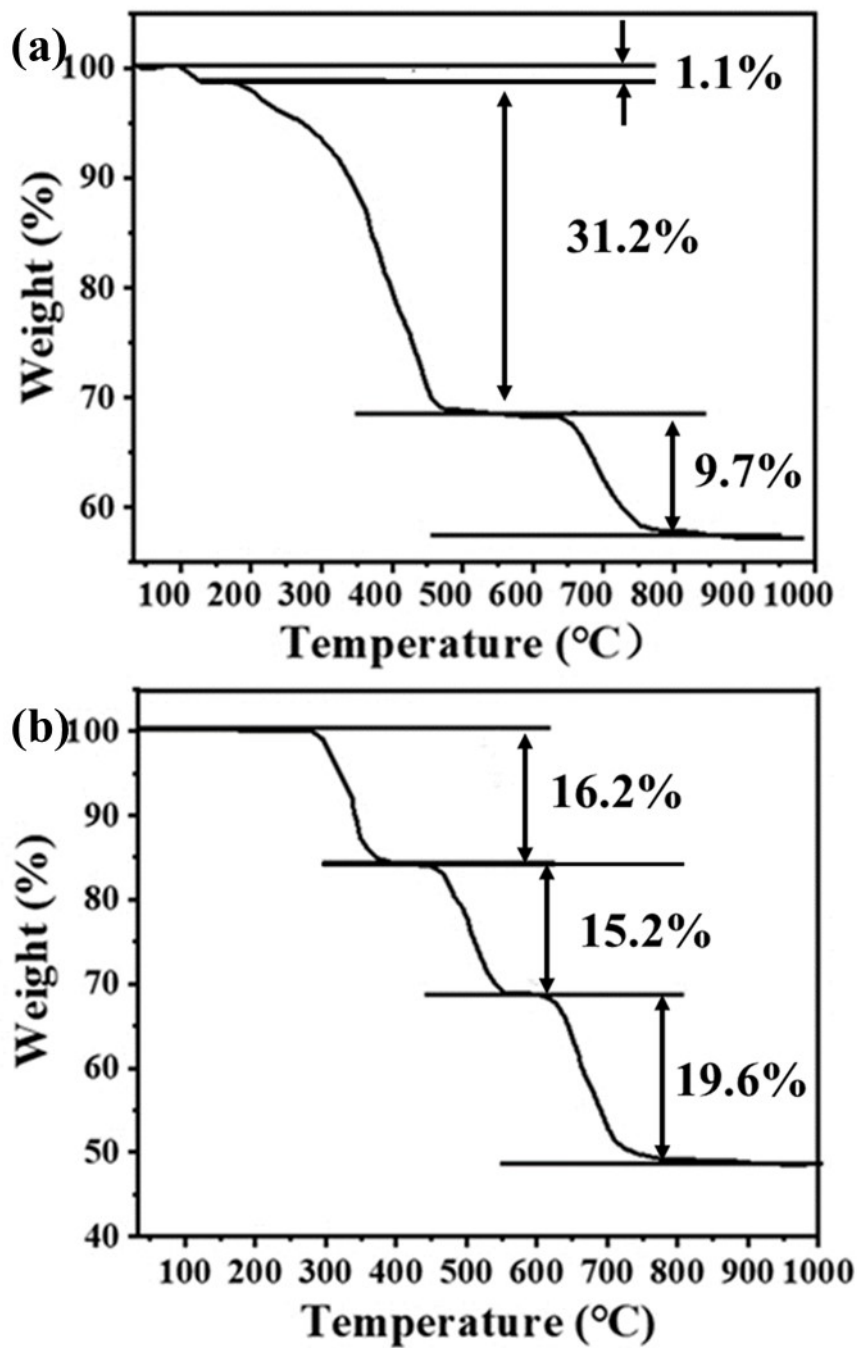

Fig. S7 The TG curve of compound 1, 2.

# XPS

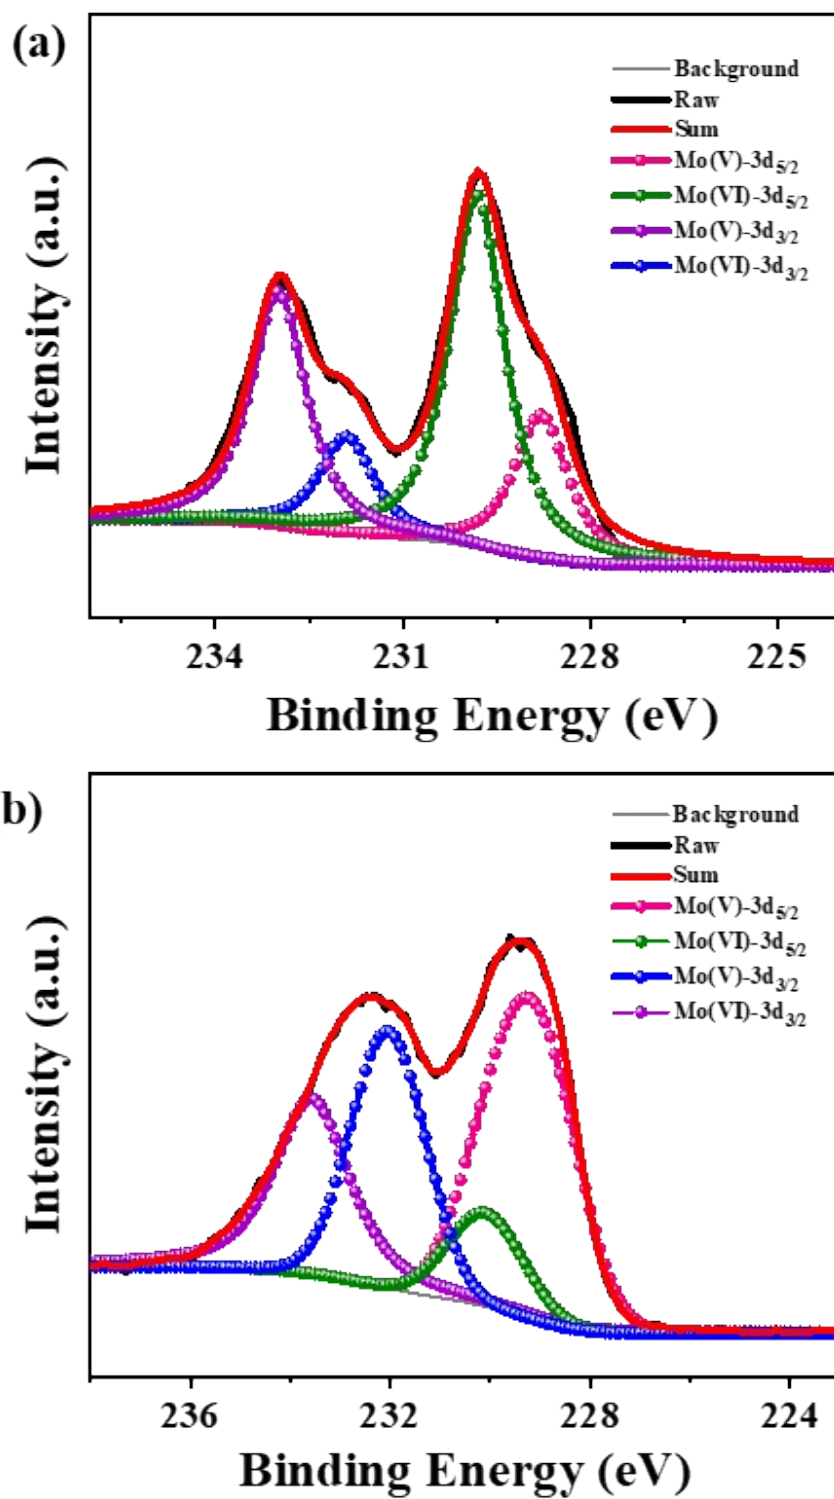

Fig. S8 X-ray photoelectron spectrum of Mo in 1 and 2.

## Section 3. Sulfur Oxidation

### Catalytic Procedures

The substrate (1 mmol), tert-Butyl hydroperoxide (TBHP) as oxidant, catalyst (0.01 mmol) and dichloromethane (5 mL) were added into 50 mL three-necked flask equipped with a magnetic stirring rotor and reflux condenser. The mixture was then reacted for 30 min in a water bath at 55 °C under stirring with dodecane as internal standard. After each cycle, the catalyst was collected by centrifugation, and washed by dichloromethane as solvent for five times and then placed in a vacuum drying oven at 80 °C to dry. After the treatment, the next reaction was carried out. In addition, we provided the GC spectrum of five cycles, from which we could calculate that the conversion rate of methyl phenyl sulfide remained at a very high level (99%) after five cycles of reaction. The value of conversion was calculated by gas chromatography analysis.

$$\text{Conversion} = \frac{n_2}{n_1} \times 100\%$$

Note:  $n_1$  = amount of substrate added,  $n_2$  = amount of product formed.

## Chemical Stability

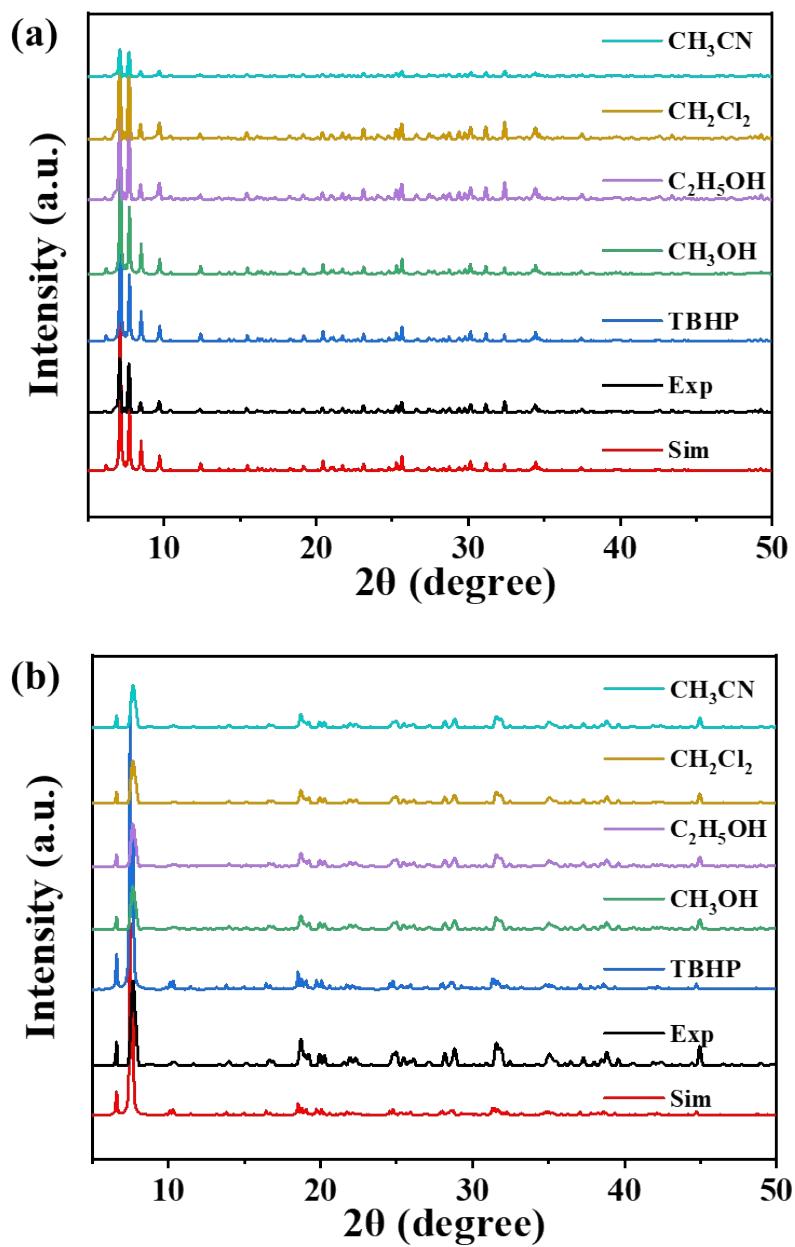

Fig. S9 X-ray diffraction patterns of compounds 1, 2 in different solution.

## Recyclability Test

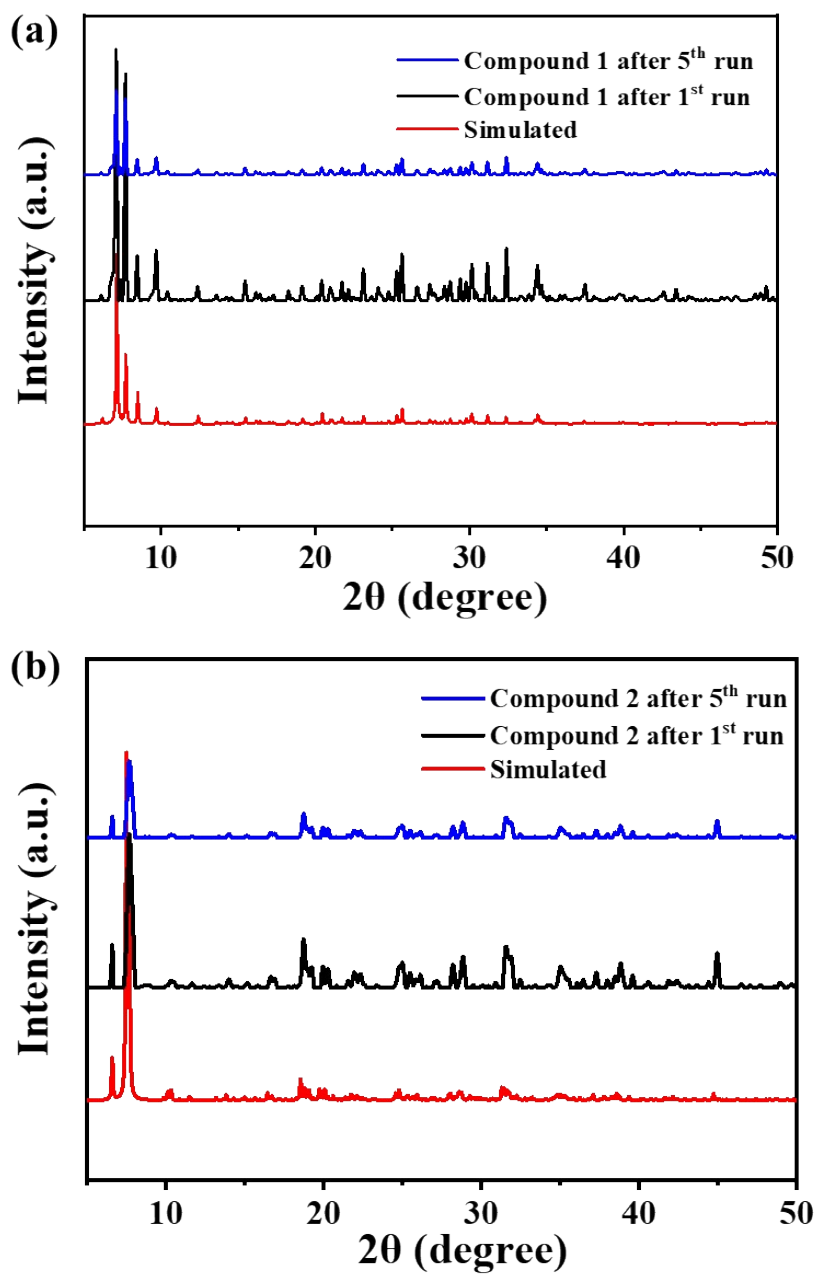

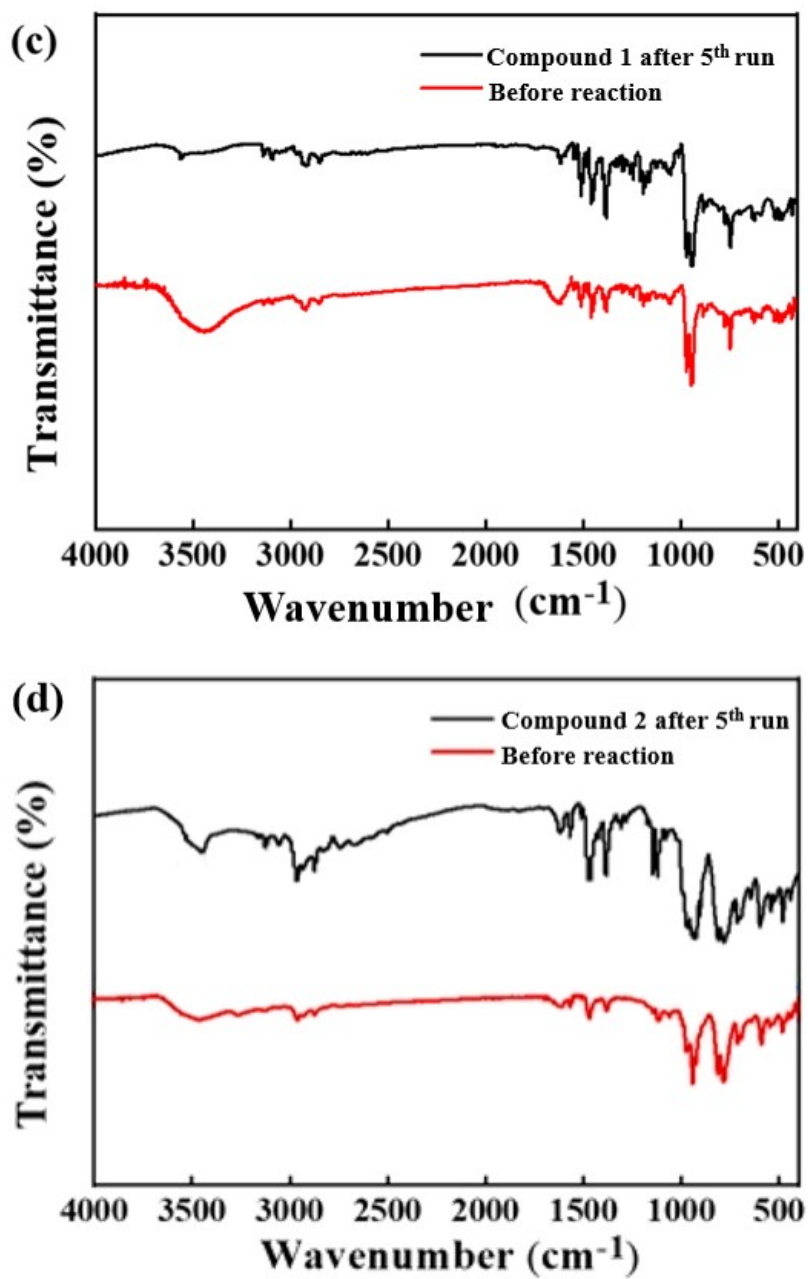

**Fig. S10** The PXRD patterns (a) and (b), FT-IR spectra (c) and (d) before reaction and after 5<sup>th</sup> cycle with catalyst **1**, **2** for sulfur oxidation.

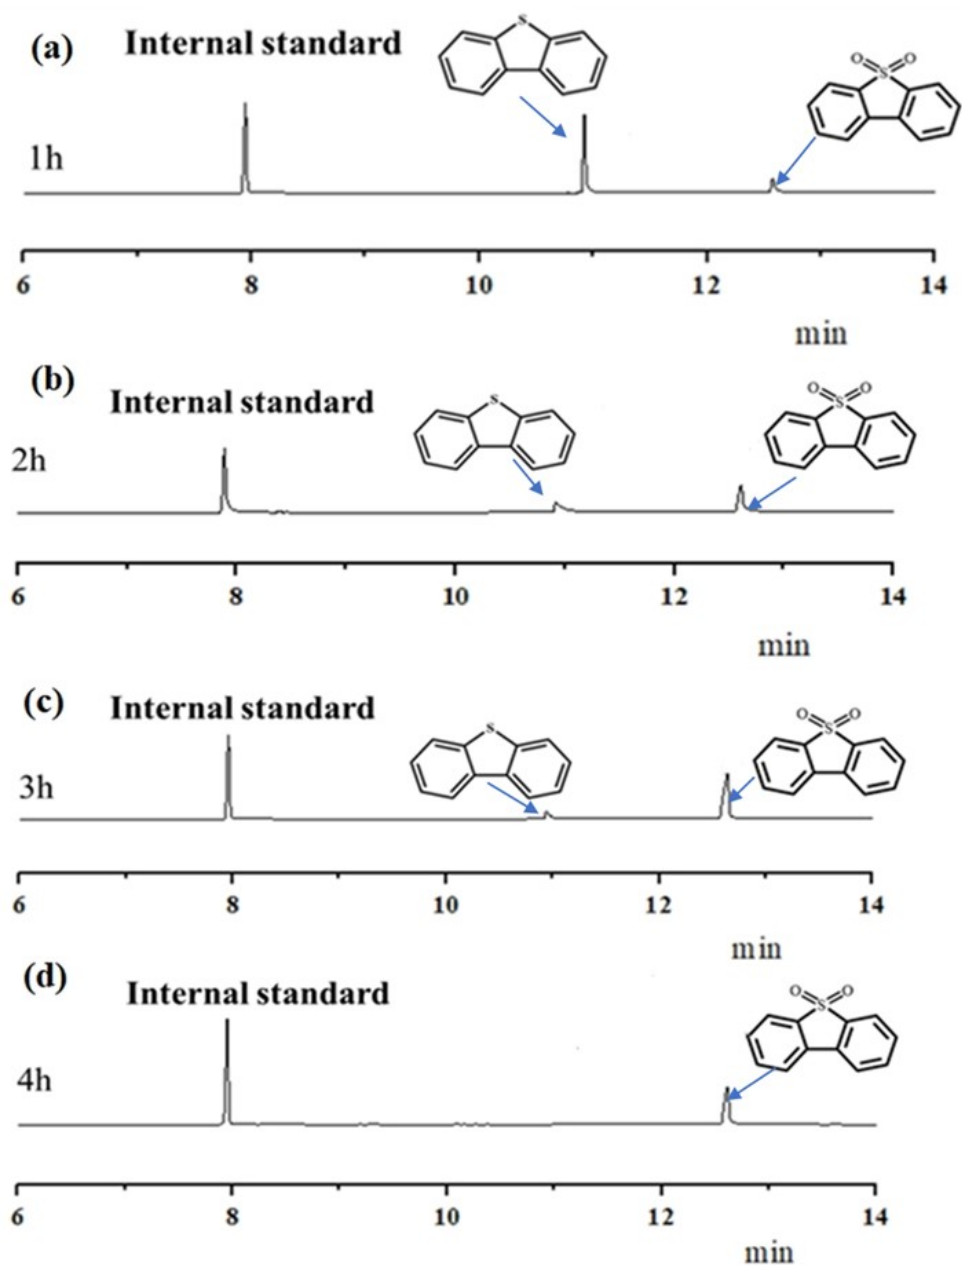

**Fig. S11** GC of sulfur oxidation reaction with catalyst **2**, TBHP as oxidant, dodecane as the internal standard and dibenzothiophene for increasing reaction time: (a) 1 h, (b) 2 h, (c) 3 h, (d) 4 h.



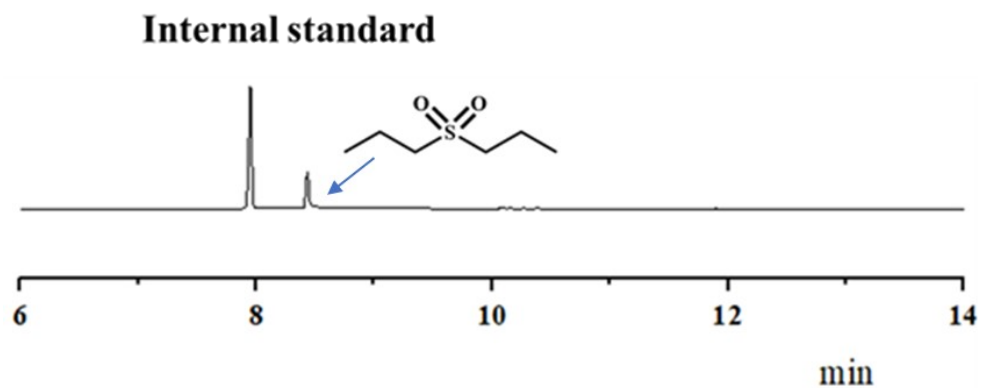

**Fig. S12** GC of sulfur oxidation reaction for the catalytic product of the dipropyl sulfide for 30 min, **2** as catalyst, TBHP as oxidant and dodecane as the internal standard.

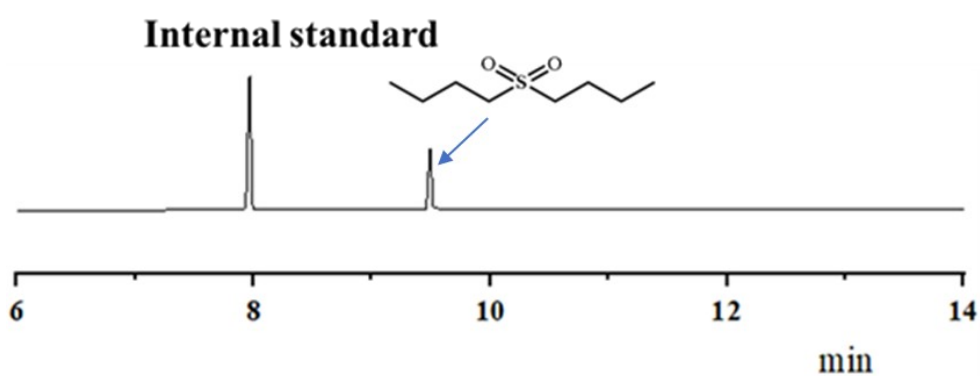

**Fig. S13** GC of sulfur oxidation reaction for the catalytic product of the dibutyl sulfide for 30 min, **2** as catalyst, TBHP as oxidant and dodecane as the internal standard.

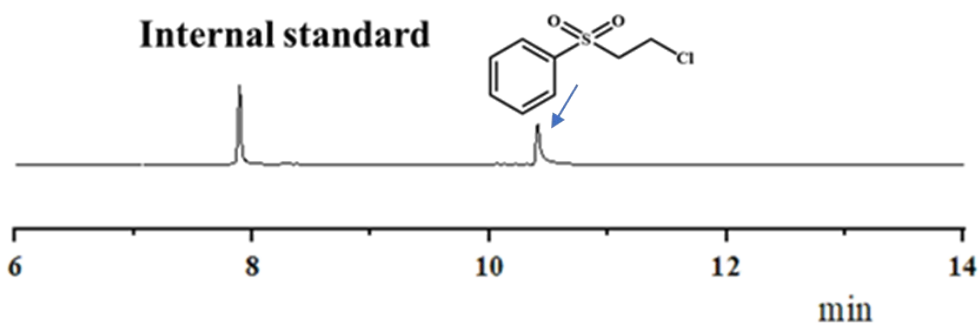

**Fig. S14** GC of sulfur oxidation reaction for the catalytic product of the 2-chloroethyl phenyl sulfide for 1h, **2** as catalyst, TBHP as oxidant and dodecane as the internal standard.

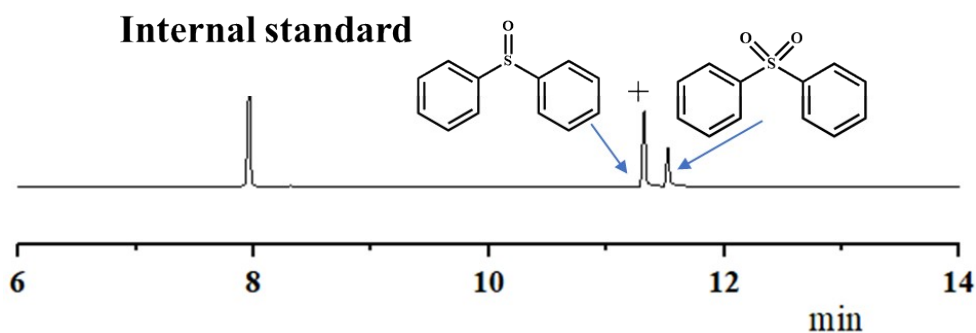

**Fig. S15** GC of the sulfur oxidation reaction for the catalytic product of the diphenyl sulfide for 30 min, **2** as catalyst, TBHP as oxidant and dodecane as the internal standard.

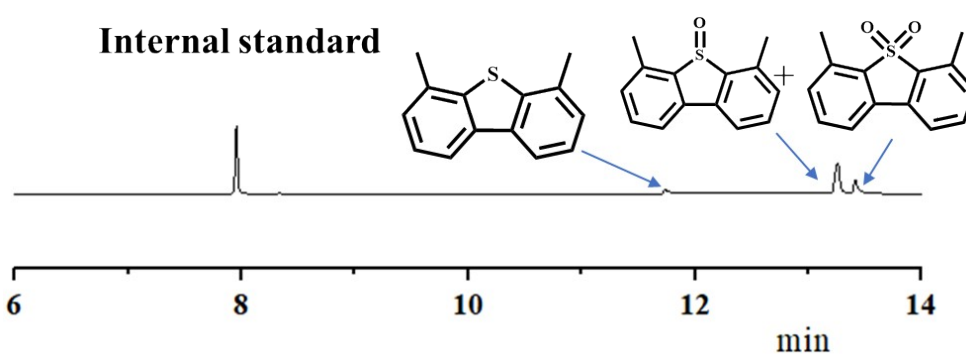

**Fig. S16** GC of the sulfur oxidation reaction for the catalytic product of the 4,6-dimethyldibenzothiophene for 4 h, **2** as catalyst, TBHP as oxidant and dodecane as the internal standard.

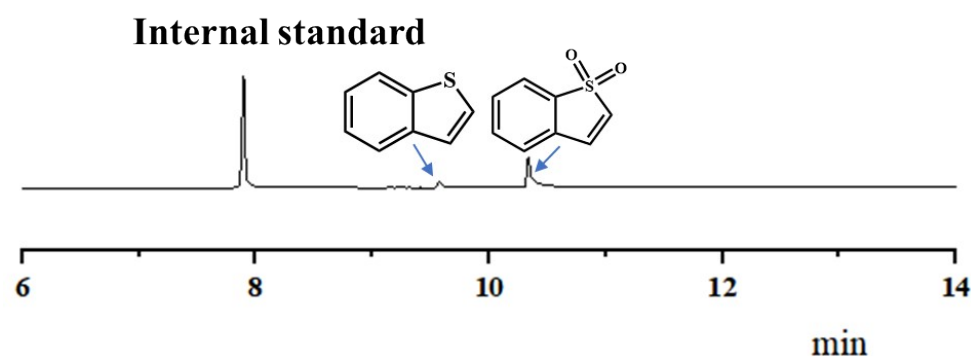

**Fig. S17** GC of the sulfur oxidation reaction for the catalytic product of the benzothiophene for 7 h, **2** as catalyst, TBHP as oxidant and dodecane as the internal standard.

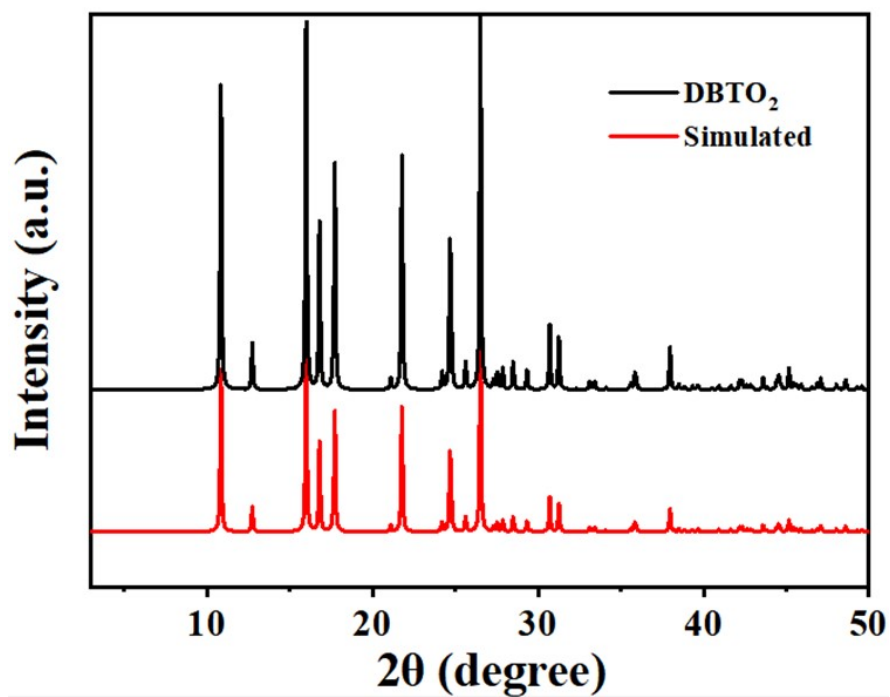

**Fig. S18** PXRD pattern of oxidation products of DBT dissolved in  $\text{CDCl}_3$  at room temperature.

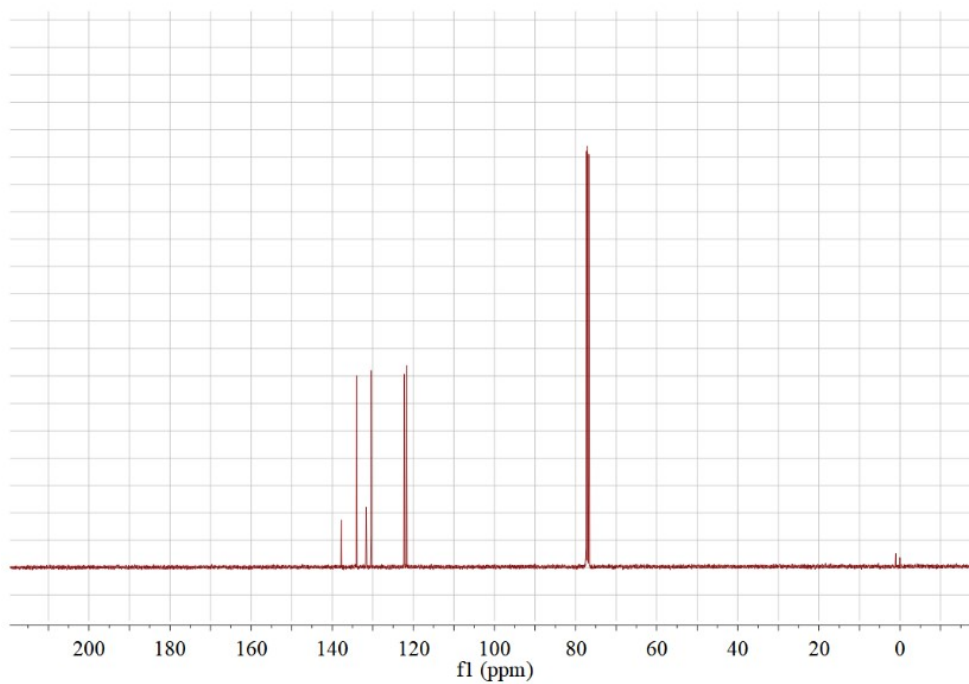

**Fig. S19**  $^{13}\text{C}$  NMR spectra of oxidation products of DBT dissolved in  $\text{CDCl}_3$  at room temperature.

### Hot Filtration Test of catalyst 1

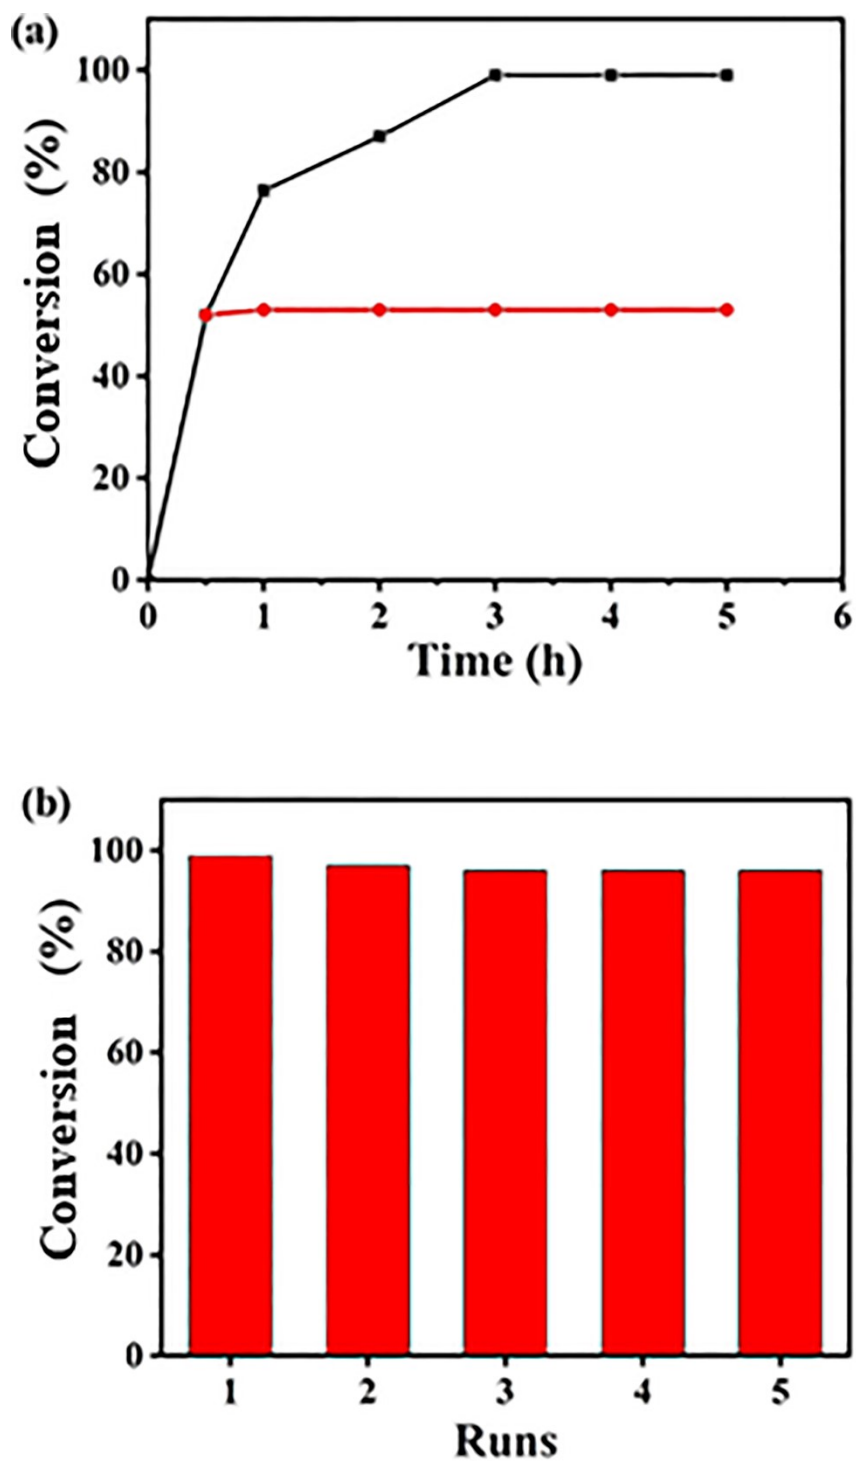

**Fig. S20** (a) Catalytic dynamic (black) and hot filtration (red) studies for the oxidation of diphenyl sulfide by **1** at 60 °C. (b) Recycling experiments based on compound **1** for the oxidation of methyl phenyl sulfide.

## Section 4. Cycloaddition of CO<sub>2</sub> to Epoxides

### Catalytic Procedures

Before catalytic measurements, freshly-prepared samples were soaked in CH<sub>2</sub>Cl<sub>2</sub> for solvent exchanging, with CH<sub>2</sub>Cl<sub>2</sub> refreshed every 4 h to remove guest molecules in the framework. The catalytic reactions were carried out in 25 mL stainless-steel high-pressure reactor. The activated catalyst 0.03 mmol, together with the epoxide (40 mmol) and cocatalyst of tetra-*n*-tertbutyl ammonium bromide (*n*-Bu<sub>4</sub>NBr, 322.4 mg, 1 mmol) were transferred to the reactor immediately. The reactor was pressurized with CO<sub>2</sub> up to 0.5 MPa and stirred at 60 °C for 7 h. When the reaction was completed, the reactor was quickly cooled in ice water. For the catalyst recycling test, the catalyst was isolated by filtration and washed several times with EtOH and CH<sub>2</sub>Cl<sub>2</sub> to fully remove the substrates, then dried under vacuum and reused in another catalytic experiment. The yield of product was determined by GC, <sup>1</sup>H NMR spectroscopy.

## Recyclability Test of catalyst 2

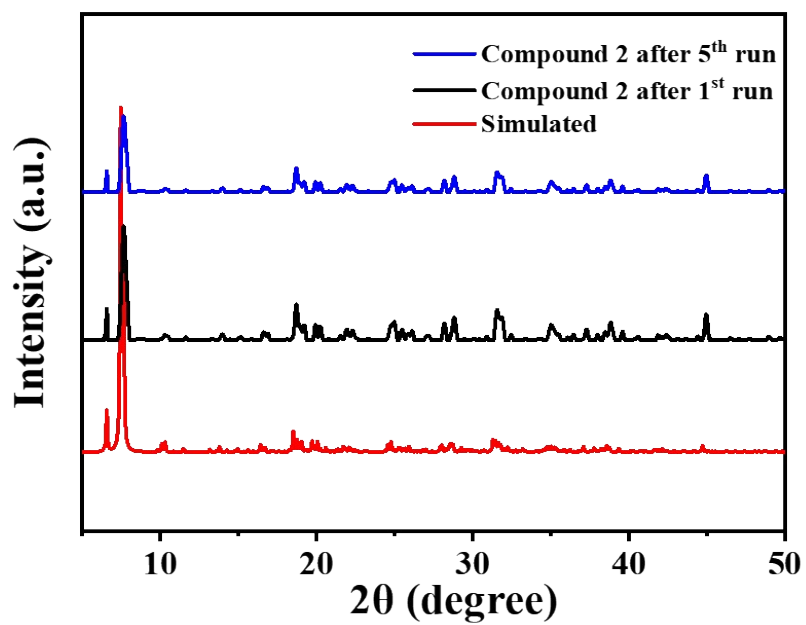

**Fig. S21** The PXRD patterns, after the 1<sup>st</sup> and the 5<sup>th</sup> cycle with catalyst 2 for cycloaddition of CO<sub>2</sub> reactions.

## Section 5. Tables

**Table S1.** Sul oxidation reactions of various sulfides with **1** at different conditions <sup>a</sup>.

Reaction scheme: Phenyl sulfide + Catalyst 1, TBHP in CH<sub>2</sub>Cl<sub>2</sub> yields Phenyl sulfoxide + Phenyl sulfone.

| Entry | Oxidant | Oxidant mmol | T °C | t min | Solvent                         | Conv. <sup>b</sup> % |
|-------|---------|--------------|------|-------|---------------------------------|----------------------|
| 1     | TBHP    | 5            | 55   | 30    | CH <sub>2</sub> Cl <sub>2</sub> | 92                   |
| 2     | TBHP    | 5            | 60   | 30    | CH <sub>2</sub> Cl <sub>2</sub> | 99                   |
| 3     | TBHP    | 5            | 60   | 20    | CH <sub>2</sub> Cl <sub>2</sub> | 97                   |
| 4     | TBHP    | 4            | 60   | 30    | CH <sub>2</sub> Cl <sub>2</sub> | 99                   |
| 5     | TBHP    | 4            | 60   | 30    | methanol                        | 65                   |
| 6     | TBHP    | 4            | 60   | 30    | ethanol                         | 81                   |

<sup>a</sup>Reaction conditions: substrate, 1 mmol; catalyst **1**, 0.01 mmol; solvent, 5 mL, <sup>b</sup>conversions were determined by GC-FID using dodecane as internal standard.

**Table S2.** Sul oxidation reactions of various sulfides with **1** at different conditions <sup>a</sup>.

| Entry | Substrate                                                                           | t<br>h   | Conv. <sup>b</sup><br>% |
|-------|-------------------------------------------------------------------------------------|----------|-------------------------|
| 1     | 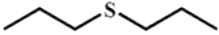   | 0.5      | 99                      |
| 2     |    | 0.5      | 99                      |
| 3     |    | 0.5      | 99                      |
| 4     |    | 0.5<br>1 | 76.3<br>99              |
| 5     |    | 1<br>3   | 77<br>99                |
| 6     |   | 1<br>7   | 12<br>73                |
| 7     |  | 1<br>7   | 8<br>41                 |
| 8     |  | 1<br>12  | 3<br>35                 |

<sup>a</sup>Reaction conditions: catalyst **1**, 0.01 mmol; substrate, 1 mmol; oxidant, 4 mmol; CH<sub>2</sub>Cl<sub>2</sub>, 5 mL, and temperature (60 °C). <sup>b</sup>Conversions were determined by GC-FID using dodecane as an internal standard.

**Table S3.** Catalytic comparison of **1** and **2** with related POM-based catalysts.

| Catalyst                                                                                                                   | Substrate                                                                           | Temperature (°C)/<br>Time (h) | Conv. <sup>b</sup><br>(%) | Ref.      |
|----------------------------------------------------------------------------------------------------------------------------|-------------------------------------------------------------------------------------|-------------------------------|---------------------------|-----------|
| <b>1</b>                                                                                                                   | 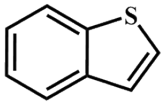 | 60/12                         | 35                        | This work |
| <b>2</b>                                                                                                                   |                                                                                     | 55/7                          | 85                        | This work |
| [Zn <sub>1.5</sub> (LOH) <sub>3</sub> ] · (PMo <sub>12</sub> O <sub>40</sub> ) ·<br>CH <sub>3</sub> OH · 2H <sub>2</sub> O |                                                                                     | 50/12                         | 33                        | 2         |



|                                                                                                                                                   |                                                                                     |        |      |           |
|---------------------------------------------------------------------------------------------------------------------------------------------------|-------------------------------------------------------------------------------------|--------|------|-----------|
| $[\text{Co}_2\text{L}'_{0.5}\text{V}_4\text{O}_{12}] \cdot 3\text{DMF} \cdot 5\text{H}_2\text{O}$                                                 |                                                                                     | 50/12  | 75   | 3         |
| $[\text{Ag}_3\text{L}_2] [\text{PMo}_{12}\text{O}_{40}] \cdot \text{CH}_3\text{CN} \cdot 4\text{H}_2\text{O}$                                     |                                                                                     | 50/12  | 13.5 | 4         |
| $[\text{Ag}_4(\text{PMo}_{12}\text{O}_{40}) (\text{L})_2] \cdot \text{OH}$                                                                        |                                                                                     | 40/12  | 4    | 5         |
| <b>1</b>                                                                                                                                          | 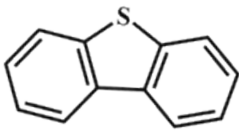   | 60/7   | 73   | This work |
| <b>2</b>                                                                                                                                          |                                                                                     | 55/4   | 99   | This work |
| $[\text{Zn}_{1.5}(\text{LOH})_3] (\text{PMo}_{12}\text{O}_{40})$<br>$\text{CH}_3\text{OH} \cdot 2\text{H}_2\text{O} (2)$                          |                                                                                     | 50/12  | 80   | 2         |
| $[\text{Co}_2\text{L}'_{0.5}\text{V}_4\text{O}_{12}] \cdot 3\text{DMF} \cdot 5\text{H}_2\text{O}$                                                 |                                                                                     | 50/12  | 93   | 3         |
| $[\text{Ag}_3\text{L}_2] [\text{PMo}_{12}\text{O}_{40}] \cdot \text{CH}_3\text{CN} \cdot 4\text{H}_2\text{O}$                                     |                                                                                     | 50/12  | 78.5 | 4         |
| $(\text{en})[\text{Cu}_3(\text{ptz})_4(\text{H}_2\text{O})_4][\text{Co}_2\text{Mo}_{10}\text{H}_4\text{O}_{38}]$<br>$\cdot 24\text{H}_2\text{O}$  |                                                                                     | 50/12  | 80   | 6         |
| $[\text{Ag}_4(\text{PMo}_{12}\text{O}_{40}) (\text{L})_2] \cdot \text{OH}$                                                                        |                                                                                     | 40/12  | 87   | 5         |
| <b>1</b>                                                                                                                                          |  | 60/1   | 77   | This work |
| <b>2</b>                                                                                                                                          |                                                                                     | 55/0.5 | 99   | This work |
| $[\text{Zn}_{1.5}(\text{LOH})_3] (\text{PMo}_{12}\text{O}_{40})$<br>$\text{CH}_3\text{OH} \cdot 2\text{H}_2\text{O} (2)$                          |                                                                                     | 50/6   | 99   | 2         |
| $(\text{en})[\text{Cu}_3(\text{ptz})_4(\text{H}_2\text{O})_4] [\text{Co}_2\text{Mo}_{10}\text{H}_4\text{O}_{38}]$<br>$\cdot 24\text{H}_2\text{O}$ |                                                                                     | 40/8   | 60.5 | 6         |
| $[\text{Ag}_3\text{L}_2] [\text{PMo}_{12}\text{O}_{40}] \cdot \text{CH}_3\text{CN} \cdot 4\text{H}_2\text{O}$                                     |                                                                                     | 50/4   | 73.9 | 4         |

**Table S4.** Catalytic comparison of **2** for cycloaddition of CO<sub>2</sub> to epoxides.

| Catalyst                                                                | Substrate                                                                         | P (MPa)/T (°C)/<br>t (h)                                                            | Conv.<br>(%) | Ref.      |
|-------------------------------------------------------------------------|-----------------------------------------------------------------------------------|-------------------------------------------------------------------------------------|--------------|-----------|
| <b>2</b>                                                                | 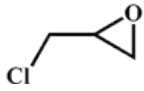 | 0.5/60/7                                                                            | 99           | This work |
| CPM-200-In/Mg                                                           |                                                                                   | 1.2/80/6                                                                            | 90.3         | 7         |
| Zn-C <sub>3</sub> N <sub>4</sub> (25)                                   |                                                                                   | 2/130/5                                                                             | 88           | 8         |
| [DBUH][PFPhO]/β-CD                                                      |                                                                                   | 3/130/10                                                                            | 98.8         | 9         |
| [Cd <sub>3</sub> (HECTV)(bdc) <sub>3</sub> ] · DMF·6H <sub>2</sub> O    |                                                                                   | 0.1/80/2                                                                            | 68           | 10        |
| <b>2</b>                                                                |  | 0.5/60/7                                                                            | 99           | This work |
| CPM-200-In/Mg                                                           |                                                                                   | 1.2/80/6                                                                            | 87.3         | 7         |
| Zn-C <sub>3</sub> N <sub>4</sub> (25)                                   |                                                                                   | 2/130/5                                                                             | 99           | 8         |
| [DBUH][PFPhO]/β-CD                                                      |                                                                                   | 3/130/10                                                                            | 98.7         | 9         |
| <b>2</b>                                                                |                                                                                   |  | 0.5/60/12    | 81        |
| CPM-200-In/Mg                                                           | 1.2/80/6                                                                          |                                                                                     | 71.9         | 7         |
| Zn-C <sub>3</sub> N <sub>4</sub> (25)                                   | 2/130/5                                                                           |                                                                                     | 45           | 8         |
| [DBUH][PFPhO]/β-CD                                                      | 3/130/10                                                                          |                                                                                     | 95.6         | 9         |
| [Zn <sub>3</sub> (HECTV)(OHbdc) <sub>3</sub> ] · 3DMF·4H <sub>2</sub> O | 0.1/80/4                                                                          |                                                                                     | 65           | 10        |

**Table S5.** Crystallographic data and structural refinements for **1-2**.

| Compound                                                             | <b>1</b>                                                                                              | <b>2</b>                                                                                          |
|----------------------------------------------------------------------|-------------------------------------------------------------------------------------------------------|---------------------------------------------------------------------------------------------------|
| Formula                                                              | C <sub>55</sub> H <sub>58</sub> Mo <sub>12</sub> N <sub>12</sub> O <sub>40.50</sub> P Zn <sub>2</sub> | C <sub>59</sub> H <sub>99</sub> Mo <sub>12</sub> N <sub>8</sub> O <sub>40</sub> P Zn <sub>4</sub> |
| Formula Weight                                                       | 2848.10                                                                                               | 3004.19                                                                                           |
| T(K)                                                                 | 296.15                                                                                                | 296.15                                                                                            |
| Crystal System                                                       | monoclinic                                                                                            | tetragonal                                                                                        |
| Space group                                                          | <i>C2/c</i>                                                                                           | <i>I4<sub>1</sub>cd</i>                                                                           |
| a(Å)                                                                 | 23.936(2)                                                                                             | 32.635(2)                                                                                         |
| b(Å)                                                                 | 18.220(2)                                                                                             | 32.635(2)                                                                                         |
| c(Å)                                                                 | 19.260(2)                                                                                             | 34.282(3)                                                                                         |
| α (°)                                                                | 90                                                                                                    | 90                                                                                                |
| β (°)                                                                | 106.755(2)                                                                                            | 90                                                                                                |
| γ (°)                                                                | 90                                                                                                    | 90                                                                                                |
| V (Å <sup>3</sup> )                                                  | 8043.0(16)                                                                                            | 36512(6)                                                                                          |
| Z                                                                    | 4                                                                                                     | 16                                                                                                |
| D <sub>c</sub> (mg m <sup>-3</sup> )                                 | 2.352                                                                                                 | 2.186                                                                                             |
| μ (mm <sup>-1</sup> )                                                | 2.504                                                                                                 | 2.719                                                                                             |
| F (000)                                                              | 5500                                                                                                  | 23488                                                                                             |
| θ range (°)                                                          | 1.428 -25.005                                                                                         | 1.2-25.0                                                                                          |
| Crystal size (mm <sup>3</sup> )                                      | 0.12×0.12×0.13                                                                                        | 0.12×0.12×0.12                                                                                    |
| Limiting indices                                                     | -28≤h≤ 26 -21≤k≤ 21 -22≤l≤ 22                                                                         | -38≤h≤ 38 -35≤k≤38 -40≤l≤40                                                                       |
| Reflections collected                                                | 28661                                                                                                 | 128461                                                                                            |
| R(int)                                                               | 0.0462                                                                                                | 0.0514                                                                                            |
| Data/restraints/parameters                                           | 7073/12/564                                                                                           | 16094/153/1124                                                                                    |
| GOF                                                                  | 1.011                                                                                                 | 1.064                                                                                             |
| R <sub>1</sub> <sup>a</sup> wR <sub>2</sub> <sup>b</sup> [I > 2σ(I)] | R <sub>1</sub> <sup>a</sup> = 0.0301 WR <sub>2</sub> = 0.0612                                         | R <sub>1</sub> <sup>a</sup> = 0.0428 WR <sub>2</sub> = 0.0791                                     |
| R <sub>1</sub> , wR <sub>2</sub> (all data)                          | R <sub>1</sub> =0.0253 WR <sub>2</sub> =0.0595                                                        | R <sub>1</sub> = 0.0339 WR <sub>2</sub> =0.0751                                                   |

$$^a R_1 = \sum ||F_o| - |F_c|| / \sum |F_o|. \quad ^b wR_2 = \sum [w (F_o^2 - F_c^2)^2] / \sum [w(F_o^2)^2]^{1/2}.$$

**Table S6.** Selected bond lengths (Å) for compound 1.

|               |          |               |          |
|---------------|----------|---------------|----------|
| Mo(1)-O(3)    | 1.687(2) | Mo(4)-O(14)   | 1.677(2) |
| Mo(1)-O(1)    | 1.857(2) | Mo(4)-O(13)   | 1.930(2) |
| Mo(1)-O(5)    | 1.874(2) | Mo(4)-O(10)   | 1.935(2) |
| Mo(1)-O(2)    | 1.979(2) | Mo(4)-O(15)   | 1.935(2) |
| Mo(1)-O(4)    | 1.990(2) | Mo(4)-O(19)#1 | 1.961(2) |
| Mo(1)-O(6)    | 2.450(2) | Mo(4)-O(11)   | 2.470(2) |
| Mo(2)-O(9)    | 1.687(2) | Mo(5)-O(16)   | 1.680(2) |
| Mo(2)-O(8)    | 1.869(2) | Mo(5)-O(12)   | 1.873(2) |
| Mo(2)-O(10)   | 1.877(2) | Mo(5)-O(13)   | 1.877(2) |
| Mo(2)-O(4)    | 1.934(2) | Mo(5)-O(17)   | 1.989(2) |
| Mo(2)-O(20)#1 | 2.016(2) | Mo(5)-O(2)#1  | 2.002(2) |
| Mo(2)-O(11)   | 2.434(2) | Mo(5)-O(6)#1  | 2.441(2) |
| Mo(3)-O(7)    | 1.675(2) | Mo(6)-O(18)   | 1.690(2) |
| Mo(3)-O(8)    | 1.914(2) | Mo(6)-O(15)   | 1.853(2) |
| Mo(3)-O(5)    | 1.920(2) | Mo(6)-O(19)   | 1.868(2) |
| Mo(3)-O(12)   | 1.935(2) | Mo(6)-O(17)   | 1.966(2) |
| Mo(3)-O(1)#1  | 1.971(2) | Mo(6)-O(20)   | 2.016(2) |
| Mo(3)-O(6)#1  | 2.458(2) | Mo(6)-O(11)#1 | 2.455(2) |
| Zn(1)-N(2)    | 2.046(3) | P(1)-O(6)#1   | 1.536(2) |
| Zn(1)-N(1)    | 2.073(3) | P(1)-O(6)     | 1.536(2) |
| Zn(1)-O(17)   | 2.089(2) | P(1)-O(11)#1  | 1.536(2) |
| Zn(1)-O(2)#1  | 2.206(2) | P(1)-O(11)    | 1.536(2) |
| Zn(1)-O(4)#1  | 2.218(2) | Zn(1)-O(20)   | 2.318(2) |

**Table S7.** Selected bond angles (°) for compound 1.

|                     |            |                     |            |
|---------------------|------------|---------------------|------------|
| O(3)-Mo(1)-O(1)     | 102.76(11) | O(7)-Mo(3)-O(8)     | 102.01(11) |
| O(3)-Mo(1)-O(5)     | 101.83(11) | O(7)-Mo(3)-O(5)     | 102.36(11) |
| O(1)-Mo(1)-O(5)     | 93.75(10)  | O(8)-Mo(3)-O(5)     | 85.52(9)   |
| O(3)-Mo(1)-O(2)     | 100.87(10) | O(7)-Mo(3)-O(12)    | 103.18(11) |
| O(1)-Mo(1)-O(2)     | 91.38(10)  | O(8)-Mo(3)-O(12)    | 91.15(9)   |
| O(5)-Mo(1)-O(2)     | 154.98(9)  | O(5)-Mo(3)-O(12)    | 154.38(9)  |
| O(3)-Mo(1)-O(4)     | 101.52(10) | O(7)-Mo(3)-O(1)#1   | 101.82(11) |
| O(1)-Mo(1)-O(4)     | 155.33(9)  | O(8)-Mo(3)-O(1)#1   | 156.16(9)  |
| O(5)-Mo(1)-O(4)     | 85.52(9)   | O(5)-Mo(3)-O(1)#1   | 88.94(9)   |
| O(2)-Mo(1)-O(4)     | 79.76(9)   | O(12)-Mo(3)-O(1)#1  | 83.91(9)   |
| O(3)-Mo(1)-O(6)     | 173.52(10) | O(7)-Mo(3)-O(6)#1   | 173.01(9)  |
| O(1)-Mo(1)-O(6)     | 74.65(8)   | O(8)-Mo(3)-O(6)#1   | 83.59(8)   |
| O(5)-Mo(1)-O(6)     | 84.35(8)   | O(5)-Mo(3)-O(6)#1   | 82.10(8)   |
| O(2)-Mo(1)-O(6)     | 73.45(8)   | O(12)-Mo(3)-O(6)#1  | 72.29(8)   |
| O(4)-Mo(1)-O(6)     | 80.75(8)   | O(1)#1-Mo(3)-O(6)#1 | 72.68(8)   |
| O(9)-Mo(2)-O(8)     | 103.35(10) | O(14)-Mo(4)-O(13)   | 103.16(11) |
| O(9)-Mo(2)-O(10)    | 100.94(10) | O(14)-Mo(4)-O(10)   | 102.60(11) |
| O(8)-Mo(2)-O(10)    | 92.43(10)  | O(13)-Mo(4)-O(10)   | 90.93(9)   |
| O(9)-Mo(2)-O(4)     | 103.08(10) | O(14)-Mo(4)-O(15)   | 102.87(11) |
| O(8)-Mo(2)-O(4)     | 87.63(9)   | O(13)-Mo(4)-O(15)   | 84.49(9)   |
| O(10)-Mo(2)-O(4)    | 155.30(9)  | O(10)-Mo(4)-O(15)   | 154.50(9)  |
| O(9)-Mo(2)-O(20)#1  | 97.66(10)  | O(14)-Mo(4)-O(19)#1 | 101.67(11) |
| O(8)-Mo(2)-O(20)#1  | 158.39(9)  | O(13)-Mo(4)-O(19)#1 | 155.13(9)  |
| O(10)-Mo(2)-O(20)#1 | 88.47(9)   | O(10)-Mo(4)-O(19)#1 | 84.85(9)   |
| O(4)-Mo(2)-O(20)#1  | 82.71(9)   | O(15)-Mo(4)-O(19)#1 | 88.84(9)   |

|                     |            |                     |            |
|---------------------|------------|---------------------|------------|
| O(9)-Mo(2)-O(11)    | 169.48(9)  | O(14)-Mo(4)-O(11)   | 171.59(10) |
| O(8)-Mo(2)-O(11)    | 86.04(8)   | O(18)-Mo(6)-O(17)   | 102.26(11) |
| O(10)-Mo(2)-O(11)   | 73.58(8)   | O(15)-Mo(6)-O(17)   | 87.56(10)  |
| O(4)-Mo(2)-O(11)    | 81.79(8)   | O(19)-Mo(6)-O(17)   | 154.45(9)  |
| O(20)#1-Mo(2)-O(11) | 73.50(8)   | O(18)-Mo(6)-O(20)   | 98.99(10)  |
| O(16)-Mo(5)-O(12)   | 101.87(11) | O(15)-Mo(6)-O(20)   | 156.78(9)  |
| O(16)-Mo(5)-O(13)   | 103.05(11) | O(19)-Mo(6)-O(20)   | 88.41(9)   |
| O(12)-Mo(5)-O(13)   | 93.76(10)  | O(17)-Mo(6)-O(20)   | 80.37(9)   |
| O(16)-Mo(5)-O(17)   | 102.34(11) | O(18)-Mo(6)-O(11)#1 | 170.87(10) |
| O(12)-Mo(5)-O(17)   | 155.15(9)  | O(15)-Mo(6)-O(11)#1 | 85.60(9)   |
| O(13)-Mo(5)-O(17)   | 86.16(9)   | O(19)-Mo(6)-O(11)#1 | 73.68(8)   |
| O(16)-Mo(5)-O(2)#1  | 99.27(11)  | O(17)-Mo(6)-O(11)#1 | 81.09(8)   |
| O(12)-Mo(5)-O(2)#1  | 90.16(10)  | O(20)-Mo(6)-O(11)#1 | 73.04(8)   |
| O(13)-Mo(5)-O(2)#1  | 156.01(9)  | N(2)-Zn(1)-N(1)     | 92.67(12)  |
| O(17)-Mo(5)-O(2)#1  | 80.54(9)   | N(2)-Zn(1)-O(17)    | 166.80(11) |
| O(16)-Mo(5)-O(6)#1  | 171.07(10) | N(1)-Zn(1)-O(17)    | 92.73(10)  |
| O(12)-Mo(5)-O(6)#1  | 73.65(8)   | N(2)-Zn(1)-O(2)#1   | 116.74(11) |
| O(13)-Mo(5)-O(6)#1  | 85.12(8)   | N(1)-Zn(1)-O(2)#1   | 101.94(11) |
| O(17)-Mo(5)-O(6)#1  | 81.59(8)   | O(17)-Zn(1)-O(2)#1  | 73.78(8)   |
| O(2)#1-Mo(5)-O(6)#1 | 73.30(8)   | N(2)-Zn(1)-O(4)#1   | 85.36(10)  |
| P(1)-O(6)-Mo(5)#1   | 126.23(12) | N(1)-Zn(1)-O(4)#1   | 169.74(10) |
| P(1)-O(6)-Mo(1)     | 125.52(12) | O(17)-Zn(1)-O(4)#1  | 91.36(8)   |
| P(1)-O(6)-Mo(3)#1   | 127.07(11) | O(2)#1-Zn(1)-O(4)#1 | 70.23(8)   |
| P(1)-O(11)-Mo(2)    | 125.19(12) | N(2)-Zn(1)-O(20)    | 95.75(11)  |
| P(1)-O(11)-Mo(6)#1  | 125.35(12) | N(1)-Zn(1)-O(20)    | 120.01(10) |
| Mo(2)-O(11)-Mo(6)#1 | 91.69(7)   | O(17)-Zn(1)-O(20)   | 71.14(8)   |
| P(1)-O(11)-Mo(4)    | 126.96(11) | O(2)#1-Zn(1)-O(20)  | 125.42(8)  |
| O(13)-Mo(4)-O(11)   | 83.49(8)   | O(4)#1-Zn(1)-O(20)  | 70.23(8)   |
| O(10)-Mo(4)-O(11)   | 71.84(8)   | O(6)#1-P(1)-O(6)    | 109.20(17) |
| O(15)-Mo(4)-O(11)   | 82.71(8)   | O(6)#1-P(1)-O(11)#1 | 110.78(11) |
| O(19)#1-Mo(4)-O(11) | 71.90(8)   | O(6)-P(1)-O(11)#1   | 108.59(11) |
| O(18)-Mo(6)-O(15)   | 102.94(11) | O(6)#1-P(1)-O(11)   | 108.59(11) |
| O(18)-Mo(6)-O(19)   | 102.12(11) | O(6)-P(1)-O(11)     | 110.78(11) |
| O(15)-Mo(6)-O(19)   | 94.33(10)  | O(11)#1-P(1)-O(11)  | 108.91(17) |

**Table S8.** Selected bond lengths (Å) for compound 2.

|             |          |             |           |
|-------------|----------|-------------|-----------|
| Mo(1)-O(7)  | 1.682(9) | Mo(4)-O(18) | 1.668(10) |
| Mo(1)-O(9)  | 1.807(8) | Mo(4)-O(39) | 1.951(9)  |
| Mo(1)-O(8)  | 1.808(8) | Mo(4)-O(16) | 1.955(9)  |
| Mo(1)-O(35) | 1.987(8) | Mo(4)-O(17) | 2.014(10) |
| Mo(1)-O(6)  | 2.009(9) | Mo(4)-O(19) | 2.077(9)  |
| Mo(2)-O(3)  | 1.690(9) | Mo(5)-O(21) | 1.678(9)  |
| Mo(2)-O(15) | 1.827(8) | Mo(5)-O(17) | 1.829(9)  |
| Mo(2)-O(2)  | 1.832(8) | Mo(5)-O(22) | 1.833(9)  |
| Mo(2)-O(35) | 2.005(8) | Mo(5)-O(24) | 2.011(9)  |
| Mo(2)-O(6)  | 2.012(9) | Mo(5)-O(23) | 2.022(9)  |
| Mo(3)-O(14) | 1.681(9) | Mo(6)-O(37) | 1.684(10) |
| Mo(3)-O(13) | 1.948(9) | Mo(6)-O(33) | 1.824(9)  |
| Mo(3)-O(39) | 1.970(9) | Mo(6)-O(27) | 1.828(9)  |
| Mo(3)-O(16) | 1.978(9) | Mo(6)-O(24) | 1.973(9)  |
| Mo(3)-O(15) | 2.013(9) | Mo(6)-O(23) | 1.992(9)  |

|              |            |              |           |
|--------------|------------|--------------|-----------|
| Mo(7)-O(4)   | 1.661(9)   | Mo(10)-O(30) | 1.666(9)  |
| Mo(7)-O(5)   | 1.952(9)   | Mo(10)-O(29) | 1.943(8)  |
| Mo(7)-O(12)  | 1.954(9)   | Mo(10)-O(28) | 1.955(9)  |
| Mo(7)-O(33)  | 2.018(9)   | Mo(10)-O(10) | 1.969(8)  |
| Mo(7)-O(11)  | 2.095(9)   | Mo(10)-O(8)  | 2.040(9)  |
| Mo(7)-O(32)  | 2.508(8)   | Mo(10)-O(36) | 2.491(8)  |
| Mo(7)-Mo(8)  | 2.6262(15) | Mo(11)-O(20) | 1.673(9)  |
| Mo(8)-O(1)   | 1.653(9)   | Mo(11)-O(25) | 1.964(9)  |
| Mo(8)-O(13)  | 1.957(8)   | Mo(11)-O(40) | 1.978(8)  |
| Mo(8)-O(12)  | 1.975(9)   | Mo(11)-O(22) | 2.007(9)  |
| Mo(8)-O(5)   | 1.983(8)   | Mo(11)-O(19) | 2.097(8)  |
| Mo(8)-O(2)   | 2.016(8)   | Mo(11)-O(38) | 2.516(8)  |
| Mo(8)-O(34)  | 2.517(8)   | Mo(12)-O(29) | 1.941(8)  |
| Mo(9)-O(31)  | 1.659(10)  | Mo(12)-O(25) | 1.979(9)  |
| Mo(9)-O(10)  | 1.948(9)   | Mo(12)-O(40) | 1.980(8)  |
| Mo(9)-O(28)  | 1.956(9)   | Mo(12)-O(9)  | 2.031(9)  |
| Mo(9)-O(27)  | 2.004(9)   | P(1)-O(36)   | 1.539(9)  |
| Mo(9)-O(11)  | 2.100(9)   | P(1)-O(34)   | 1.547(8)  |
| Zn(1)-N(1)   | 1.936(11)  | P(1)-O(38)   | 1.554(9)  |
| Zn(1)-O(35)  | 1.967(8)   | P(1)-O(32)   | 1.562(9)  |
| Zn(1)-O(40)  | 1.968(8)   | Zn(3)-N(5)   | 1.980(10) |
| Zn(1)-O(39)  | 1.981(9)   | Zn(3)-O(28)  | 1.986(10) |
| Zn(2)-O(12)  | 1.957(9)   | Zn(4)-O(6)   | 1.946(9)  |
| Zn(2)-O(16)  | 1.973(9)   | Zn(4)-N(2)#1 | 1.962(10) |
| Zn(2)-N(3)   | 1.987(10)  | Zn(4)-O(5)   | 1.969(9)  |
| Zn(2)-O(24)  | 1.995(8)   | Zn(4)-O(10)  | 2.007(9)  |
| Zn(3)-O(25)  | 1.942(9)   | Zn(3)-O(23)  | 1.965(8)  |
| Mo(12)-O(26) | 1.683(9)   |              |           |

**Table S9.** Selected bond angles (°) for compound **2**.

|                   |          |                   |          |
|-------------------|----------|-------------------|----------|
| O(7)-Mo(1)-O(9)   | 103.6(5) | O(3)-Mo(2)-O(15)  | 104.0(4) |
| O(7)-Mo(1)-O(8)   | 104.1(4) | O(3)-Mo(2)-O(2)   | 104.2(4) |
| O(9)-Mo(1)-O(8)   | 97.3(4)  | O(15)-Mo(2)-O(2)  | 97.1(4)  |
| O(7)-Mo(1)-O(35)  | 103.8(4) | O(3)-Mo(2)-O(35)  | 103.3(4) |
| O(9)-Mo(1)-O(35)  | 88.6(4)  | O(15)-Mo(2)-O(35) | 88.5(4)  |
| O(8)-Mo(1)-O(35)  | 149.2(4) | O(2)-Mo(2)-O(35)  | 149.6(4) |
| O(7)-Mo(1)-O(6)   | 103.6(4) | O(3)-Mo(2)-O(6)   | 103.5(4) |
| O(9)-Mo(1)-O(6)   | 150.4(4) | O(15)-Mo(2)-O(6)  | 149.9(4) |
| O(8)-Mo(1)-O(6)   | 87.2(4)  | O(2)-Mo(2)-O(6)   | 87.9(4)  |
| O(35)-Mo(1)-O(6)  | 73.7(3)  | O(35)-Mo(2)-O(6)  | 73.3(3)  |
| O(7)-Mo(1)-Mo(2)  | 100.4(3) | O(3)-Mo(2)-Mo(1)  | 100.0(3) |
| O(9)-Mo(1)-Mo(2)  | 124.8(3) | O(15)-Mo(2)-Mo(1) | 124.3(3) |
| O(8)-Mo(1)-Mo(2)  | 123.7(3) | O(2)-Mo(2)-Mo(1)  | 124.4(3) |
| O(35)-Mo(1)-Mo(2) | 37.2(2)  | O(35)-Mo(2)-Mo(1) | 36.8(2)  |
| O(6)-Mo(1)-Mo(2)  | 37.6(2)  | O(6)-Mo(2)-Mo(1)  | 37.5(3)  |
| O(14)-Mo(3)-O(13) | 100.2(4) | O(18)-Mo(4)-O(39) | 107.6(5) |
| O(14)-Mo(3)-O(39) | 106.0(4) | O(18)-Mo(4)-O(16) | 106.0(4) |
| O(13)-Mo(3)-O(39) | 152.6(3) | O(39)-Mo(4)-O(16) | 93.8(4)  |
| O(14)-Mo(3)-O(16) | 106.2(4) | O(18)-Mo(4)-O(17) | 100.7(5) |
| O(13)-Mo(3)-O(16) | 87.6(4)  | O(39)-Mo(4)-O(17) | 151.0(4) |

|                   |          |                    |           |
|-------------------|----------|--------------------|-----------|
| O(39)-Mo(3)-O(16) | 92.5(4)  | O(16)-Mo(4)-O(17)  | 84.5(4)   |
| O(14)-Mo(3)-O(15) | 99.4(4)  | O(18)-Mo(4)-O(19)  | 98.2(4)   |
| O(13)-Mo(3)-O(15) | 84.6(4)  | O(39)-Mo(4)-O(19)  | 83.9(4)   |
| O(39)-Mo(3)-O(15) | 83.6(3)  | O(16)-Mo(4)-O(19)  | 155.2(4)  |
| O(16)-Mo(3)-O(15) | 154.2(3) | O(17)-Mo(4)-O(19)  | 85.8(4)   |
| O(14)-Mo(3)-Mo(4) | 100.7(3) | O(18)-Mo(4)-Mo(3)  | 101.7(4)  |
| O(13)-Mo(3)-Mo(4) | 134.4(3) | O(39)-Mo(4)-Mo(3)  | 48.2(3)   |
| O(39)-Mo(3)-Mo(4) | 47.6(3)  | O(16)-Mo(4)-Mo(3)  | 48.4(3)   |
| O(16)-Mo(3)-Mo(4) | 47.7(3)  | O(17)-Mo(4)-Mo(3)  | 131.8(3)  |
| O(15)-Mo(3)-Mo(4) | 130.6(2) | O(19)-Mo(4)-Mo(3)  | 131.7(3)  |
| O(21)-Mo(5)-O(17) | 103.3(5) | O(37)-Mo(6)-O(33)  | 104.0(4)  |
| O(21)-Mo(5)-O(22) | 103.3(5) | O(37)-Mo(6)-O(27)  | 103.7(5)  |
| O(17)-Mo(5)-O(22) | 98.8(4)  | O(33)-Mo(6)-O(27)  | 97.6(4)   |
| O(21)-Mo(5)-O(24) | 102.3(5) | O(37)-Mo(6)-O(24)  | 101.9(5)  |
| O(17)-Mo(5)-O(24) | 88.2(4)  | O(33)-Mo(6)-O(24)  | 87.5(4)   |
| O(22)-Mo(5)-O(24) | 151.1(4) | O(27)-Mo(6)-O(24)  | 151.7(4)  |
| O(21)-Mo(5)-O(23) | 102.9(5) | O(37)-Mo(6)-O(23)  | 102.5(4)  |
| O(17)-Mo(5)-O(23) | 150.7(4) | O(33)-Mo(6)-O(23)  | 150.7(4)  |
| O(22)-Mo(5)-O(23) | 87.8(4)  | O(27)-Mo(6)-O(23)  | 87.9(4)   |
| O(24)-Mo(5)-O(23) | 73.5(3)  | O(24)-Mo(6)-O(23)  | 75.0(3)   |
| O(21)-Mo(5)-Mo(6) | 99.3(4)  | O(37)-Mo(6)-Mo(5)  | 98.8(4)   |
| O(17)-Mo(5)-Mo(6) | 124.2(3) | O(33)-Mo(6)-Mo(5)  | 124.2(3)  |
| O(22)-Mo(5)-Mo(6) | 124.5(3) | O(27)-Mo(6)-Mo(5)  | 125.2(3)  |
| O(24)-Mo(5)-Mo(6) | 36.9(2)  | O(24)-Mo(6)-Mo(5)  | 37.8(2)   |
| O(23)-Mo(5)-Mo(6) | 37.6(2)  | O(23)-Mo(6)-Mo(5)  | 38.3(2)   |
| O(4)-Mo(7)-O(5)   | 106.2(5) | O(1)-Mo(8)-O(13)   | 101.0(4)  |
| O(4)-Mo(7)-O(12)  | 106.0(4) | O(1)-Mo(8)-O(12)   | 104.9(4)  |
| O(5)-Mo(7)-O(12)  | 94.3(4)  | O(13)-Mo(8)-O(12)  | 88.0(4)   |
| O(4)-Mo(7)-O(33)  | 100.0(5) | O(1)-Mo(8)-O(5)    | 104.9(4)  |
| O(5)-Mo(7)-O(33)  | 153.0(4) | O(13)-Mo(8)-O(5)   | 153.0(3)  |
| O(12)-Mo(7)-O(33) | 84.3(4)  | O(12)-Mo(8)-O(5)   | 92.7(4)   |
| O(4)-Mo(7)-O(11)  | 96.4(4)  | O(1)-Mo(8)-O(2)    | 100.4(4)  |
| O(5)-Mo(7)-O(11)  | 84.9(4)  | O(13)-Mo(8)-O(2)   | 85.0(3)   |
| O(12)-Mo(7)-O(11) | 156.8(3) | O(12)-Mo(8)-O(2)   | 154.6(3)  |
| O(33)-Mo(7)-O(11) | 86.0(4)  | O(5)-Mo(8)-O(2)    | 82.9(4)   |
| O(4)-Mo(7)-O(32)  | 169.1(4) | O(1)-Mo(8)-O(34)   | 173.2(4)  |
| O(5)-Mo(7)-O(32)  | 80.0(3)  | O(13)-Mo(8)-O(34)  | 74.1(3)   |
| O(12)-Mo(7)-O(32) | 82.0(3)  | O(12)-Mo(8)-O(34)  | 79.8(3)   |
| O(33)-Mo(7)-O(32) | 73.1(3)  | O(5)-Mo(8)-O(34)   | 79.5(3)   |
| O(11)-Mo(7)-O(32) | 75.0(3)  | O(2)-Mo(8)-O(34)   | 74.8(3)   |
| O(4)-Mo(7)-Mo(8)  | 100.9(4) | O(1)-Mo(8)-Mo(7)   | 99.1(3)   |
| O(5)-Mo(7)-Mo(8)  | 48.6(2)  | O(13)-Mo(8)-Mo(7)  | 134.8(3)  |
| O(12)-Mo(7)-Mo(8) | 48.4(3)  | O(12)-Mo(8)-Mo(7)  | 47.7(3)   |
| O(33)-Mo(7)-Mo(8) | 132.0(2) | O(5)-Mo(8)-Mo(7)   | 47.6(3)   |
| O(11)-Mo(7)-Mo(8) | 133.3(3) | O(2)-Mo(8)-Mo(7)   | 130.1(2)  |
| O(32)-Mo(7)-Mo(8) | 89.8(2)  | O(34)-Mo(8)-Mo(7)  | 87.68(19) |
| O(31)-Mo(9)-O(10) | 106.7(5) | O(30)-Mo(10)-O(29) | 100.4(4)  |
| O(31)-Mo(9)-O(28) | 106.2(4) | O(30)-Mo(10)-O(28) | 105.9(4)  |
| O(10)-Mo(9)-O(28) | 93.4(4)  | O(29)-Mo(10)-O(28) | 88.1(4)   |
| O(31)-Mo(9)-O(27) | 100.9(4) | O(30)-Mo(10)-O(10) | 104.7(4)  |
| O(10)-Mo(9)-O(27) | 151.5(4) | O(29)-Mo(10)-O(10) | 153.6(3)  |
| O(28)-Mo(9)-O(27) | 85.5(4)  | O(28)-Mo(10)-O(10) | 92.8(4)   |
| O(31)-Mo(9)-O(11) | 97.6(4)  | O(30)-Mo(10)-O(8)  | 98.3(4)   |

|                     |          |                     |          |
|---------------------|----------|---------------------|----------|
| O(10)-Mo(9)-O(11)   | 84.0(4)  | O(29)-Mo(10)-O(8)   | 84.4(3)  |
| O(28)-Mo(9)-O(11)   | 155.8(4) | O(28)-Mo(10)-O(8)   | 155.6(4) |
| O(27)-Mo(9)-O(11)   | 85.5(4)  | O(10)-Mo(10)-O(8)   | 84.0(3)  |
| O(31)-Mo(9)-Mo(10)  | 101.4(4) | O(30)-Mo(10)-O(36)  | 171.0(4) |
| O(10)-Mo(9)-Mo(10)  | 48.3(2)  | O(29)-Mo(10)-O(36)  | 74.1(3)  |
| O(28)-Mo(9)-Mo(10)  | 47.8(3)  | O(28)-Mo(10)-O(36)  | 81.3(3)  |
| O(27)-Mo(9)-Mo(10)  | 132.3(3) | O(10)-Mo(10)-O(36)  | 80.0(3)  |
| O(11)-Mo(9)-Mo(10)  | 131.9(3) | O(8)-Mo(10)-O(36)   | 74.3(3)  |
| O(20)-Mo(11)-O(25)  | 105.2(4) | O(30)-Mo(10)-Mo(9)  | 99.7(4)  |
| O(20)-Mo(11)-O(40)  | 104.9(4) | O(29)-Mo(10)-Mo(9)  | 135.2(3) |
| O(25)-Mo(11)-O(40)  | 94.1(3)  | O(28)-Mo(10)-Mo(9)  | 47.9(3)  |
| O(20)-Mo(11)-O(22)  | 100.7(4) | O(10)-Mo(10)-Mo(9)  | 47.6(3)  |
| O(25)-Mo(11)-O(22)  | 84.3(4)  | O(8)-Mo(10)-Mo(9)   | 131.2(2) |
| O(40)-Mo(11)-O(22)  | 153.8(4) | O(36)-Mo(10)-Mo(9)  | 89.1(2)  |
| O(20)-Mo(11)-O(19)  | 97.5(4)  | O(26)-Mo(12)-O(29)  | 101.1(4) |
| O(25)-Mo(11)-O(19)  | 156.7(3) | O(26)-Mo(12)-O(25)  | 105.5(4) |
| O(40)-Mo(11)-O(19)  | 85.0(3)  | O(29)-Mo(12)-O(25)  | 87.2(4)  |
| O(22)-Mo(11)-O(19)  | 86.3(4)  | O(26)-Mo(12)-O(40)  | 106.1(4) |
| O(20)-Mo(11)-O(38)  | 170.2(4) | O(29)-Mo(12)-O(40)  | 151.4(3) |
| O(25)-Mo(11)-O(38)  | 82.2(3)  | O(25)-Mo(12)-O(40)  | 93.6(3)  |
| O(40)-Mo(11)-O(38)  | 80.5(3)  | O(26)-Mo(12)-O(9)   | 100.1(4) |
| O(22)-Mo(11)-O(38)  | 73.4(3)  | O(29)-Mo(12)-O(9)   | 84.5(3)  |
| O(19)-Mo(11)-O(38)  | 74.7(3)  | O(25)-Mo(12)-O(9)   | 154.2(3) |
| O(20)-Mo(11)-Mo(12) | 99.6(3)  | O(40)-Mo(12)-O(9)   | 82.5(3)  |
| O(25)-Mo(11)-Mo(12) | 48.4(3)  | O(26)-Mo(12)-Mo(11) | 100.8(3) |
| O(40)-Mo(11)-Mo(12) | 48.4(2)  | O(29)-Mo(12)-Mo(11) | 133.9(2) |
| O(22)-Mo(11)-Mo(12) | 132.0(3) | O(25)-Mo(12)-Mo(11) | 47.9(3)  |
| O(19)-Mo(11)-Mo(12) | 133.0(2) | O(40)-Mo(12)-Mo(11) | 48.3(2)  |
| O(38)-Mo(11)-Mo(12) | 90.0(2)  | O(9)-Mo(12)-Mo(11)  | 130.2(2) |
| N(1)-Zn(1)-O(35)    | 105.3(4) | O(12)-Zn(2)-O(16)   | 98.2(4)  |
| N(1)-Zn(1)-O(40)    | 121.2(4) | O(12)-Zn(2)-N(3)    | 126.4(5) |
| O(35)-Zn(1)-O(40)   | 109.1(4) | O(16)-Zn(2)-N(3)    | 108.4(4) |
| N(1)-Zn(1)-O(39)    | 109.2(4) | O(12)-Zn(2)-O(24)   | 108.4(4) |
| O(35)-Zn(1)-O(39)   | 111.7(4) | O(16)-Zn(2)-O(24)   | 110.4(4) |
| O(40)-Zn(1)-O(39)   | 100.4(3) | N(3)-Zn(2)-O(24)    | 104.6(5) |
| O(25)-Zn(3)-O(23)   | 110.6(4) | O(6)-Zn(4)-N(2)#1   | 108.7(4) |
| O(25)-Zn(3)-N(5)    | 125.6(4) | O(6)-Zn(4)-O(5)     | 111.5(4) |
| O(23)-Zn(3)-N(5)    | 105.7(5) | N(2)#1-Zn(4)-O(5)   | 124.3(4) |
| O(25)-Zn(3)-O(28)   | 98.2(4)  | O(6)-Zn(4)-O(10)    | 110.5(4) |
| O(23)-Zn(3)-O(28)   | 107.4(4) | N(2)#1-Zn(4)-O(10)  | 102.1(4) |
| N(5)-Zn(3)-O(28)    | 108.1(5) | O(5)-Zn(4)-O(10)    | 98.1(4)  |
| O(36)-P(1)-O(34)    | 111.0(3) | O(36)-P(1)-O(32)    | 108.8(5) |
| O(36)-P(1)-O(38)    | 109.1(5) | O(34)-P(1)-O(32)    | 108.2(5) |
| O(34)-P(1)-O(38)    | 108.5(5) | O(38)-P(1)-O(32)    | 111.2(3) |
| P(1)-O(32)-Mo(7)    | 126.0(5) | P(1)-O(36)-Mo(10)   | 127.9(5) |
| P(1)-O(34)-Mo(8)    | 128.3(4) | P(1)-O(38)-Mo(11)   | 125.9(5) |



**Table S10.** Hydrogen bonds for compound **1** [Å and °].

| D-H...A      | D-H    | H...A  | D...A    | D-H...A |
|--------------|--------|--------|----------|---------|
| N5-H5...O20  | 0.8600 | 1.9800 | 2.838(4) | 177.00  |
| C4-H4...O5   | 0.9300 | 2.5400 | 3.458(6) | 168.00  |
| C8-H8A...O19 | 0.9700 | 2.4300 | 3.210(4) | 137.00  |
| C10-H10...O3 | 0.9300 | 2.4200 | 3.210(4) | 143.00  |
| C14-H14...O1 | 0.9300 | 2.4600 | 3.367(7) | 167.00  |
| C17-H17B...O | 0.9700 | 2.4600 | 3.406(5) | 165.00  |
| C21-H21...O9 | 0.9300 | 2.4000 | 3.064(5) | 129.00  |

**Table S11.** Hydrogen bonds for compound **2** [Å and °].

| D-H...A         | D-H    | H...A  | D...A     | D-H...A |
|-----------------|--------|--------|-----------|---------|
| N4-H4...O29     | 0.8600 | 1.9400 | 2.801(15) | 176.00  |
| N6-H6...O13     | 0.8600 | 1.9300 | 2.789(16) | 179.00  |
| C9-H9...O40     | 0.9300 | 2.5900 | 3.324(16) | 136.00  |
| C10-H10...O17   | 0.9300 | 2.5800 | 3.335(19) | 138.00  |
| C5A-H5AA...O21  | 0.9700 | 2.5400 | 3.50(2)   | 171.00  |
| C10A-H10A...O21 | 0.9700 | 2.4800 | 3.24(2)   | 134.00  |
| C14-H14...O29   | 0.9300 | 2.4400 | 3.31(2)   | 156.00  |
| C18-H18...O12   | 0.9300 | 2.5600 | 3.23(2)   | 129.00  |
| C21A-H21A...O30 | 0.9700 | 2.2400 | 3.18(2)   | 163.00  |
| C23-H23...O13   | 0.9300 | 2.5100 | 3.27(2)   | 140.00  |
| C27-H27...O25   | 0.9300 | 2.4600 | 3.19(2)   | 135.00  |

## Section 6. Reference

### References:

1. A. Bak, A. Fs, A. Ht, B. Htn and C. Nd, *J. Mol. Liq.* 2021, **342**, 117104.
2. Y. Gu, Y. Choe and D. Park, *Cryst. Growth Des.* 2020, **21**, 1019-1027.
3. B. Lu, J. Yang, Y. Liu and J. Ma, *Inorg. Chem.* 2017, **56**, 11710-11720.
4. Z. Li, Y. Liu, G. Xu and J. Ma, *Polyhedron.* 2020, **178**, 114324.
5. M. Yu, T. Guo, X. Shi, J. Yang, X. Xu, J. Ma and Z. Yu, *Inorg. Chem.* 2019, **58**, 11010-11019.
6. H. An, Y. Hou, L. Wang, Y. Zhang, W. Yang and S. Chang, *Inorg. Chem.* 2017, **56**, 11619-11632
7. Y. Gu, Y. Choe and D. Park, *Catal.* 2021, **11**, 430.
8. X. Wang, M. S. Liu, L. Yang, J. W. Lan, Y. L. Chen and J. M. Sun, *ChemistrySelect.*, 2018, **3**, 4101-4109.
9. K. Li, X. Wu, Q. Gu, X. Zhao and Z. Hou, *RSC Adv.* 2017, **7**, 14721-14732.
10. Da-Wei, Kang, Xue, Han, Xin-Jun, Ma, Ying-Ying, Liu and Jian-Fang, *Dalton Trans.* 2018, **47**, 16197-162.
